## **Correlates of COVID-19 conspiracy theory beliefs in Japan: A nationally-representative cross-sectional survey**

Yukihiro Sato<sup>1,2\*</sup>, Ichiro Kawachi<sup>3</sup>, Yasuaki Saijo<sup>1</sup>, Eiji Yoshioka<sup>1</sup>, Ken Osaka<sup>2</sup>, Takahiro Tabuchi<sup>4,5,6</sup>

<sup>1</sup> *Department of Social Medicine, Asahikawa Medical University, Hokkaido, Japan*

<sup>2</sup> *Department of International and Community Oral Health, Tohoku University Graduate School of Dentistry, Miyagi, Japan*

<sup>3</sup> *Department of Social and Behavioral Sciences, Harvard T.H. Chan School of Public Health, Boston, MA, United States*

<sup>4</sup> *Division of Epidemiology, School of Public Health, Tohoku University Graduate School of Medicine, Miyagi, Japan.*

<sup>5</sup> *Cancer Control Center, Osaka International Cancer Institute, Osaka, Japan*

<sup>6</sup> *The Tokyo Foundation for Policy Research, Tokyo, Japan*

### **\*Corresponding Author**

e-mail address: [ys@epid.work](mailto:ys@epid.work) (YS)

## 1 **Abstract**

2 **Background:** The COVID-19 pandemic was associated with an increase in conspiracy  
3 theories worldwide. However, the prevalence of COVID-19 conspiracy beliefs among  
4 Japanese has remained unclear. This study aimed to estimate the prevalence and correlates of  
5 COVID-19 conspiracy beliefs in Japan using a nationwide survey of 28,175 residents aged  
6 16–81 years old.

7 **Methods:** A nationally representative, cross-sectional self-administered survey was  
8 conducted from September to October 2021. To assess the number of COVID-19 conspiracy  
9 beliefs, we used three questions from the Oxford Coronavirus Explanations, Attitudes, and  
10 Narratives Survey. Independent variables included general vaccine conspiracy beliefs,  
11 sociodemographic variables, information sources for COVID-19, trust in authorities, and fear  
12 of COVID-19.

13 **Results:** After applying sampling weights and imputation, the estimated prevalence of  
14 holding at least one COVID-19 conspiracy belief was 24.4%. From a linear regression model,  
15 several factors were independently associated with conspiracy beliefs. Notably, people with  
16 the lowest level of education (lower secondary school) endorsed fewer COVID-19 conspiracy  
17 beliefs (B -0.089, vs. upper secondary school). Furthermore, higher socioeconomic  
18 backgrounds—such as higher income, higher wealth, and regular employment—were associated  
19 with endorsing conspiracy beliefs. Additionally, only 37.3% of respondents trusted the  
20 government of Japan, but paradoxically, trust in the government was positively associated  
21 with conspiracy beliefs (B 0.175, vs. distrust).

22 **Conclusions:** Conspiracy beliefs about COVID-19 were prevalent in about a quarter of the  
23 Japanese population. Certain groups are more likely to endorse conspiracy beliefs, and  
24 targeting interventions towards these groups might be efficient in stemming the spread of  
25 conspiracy beliefs.

## 26 INTRODUCTION

27 A simple definition of conspiracy theory is “an explanation that a significant event has  
28 resulted from a small group of powerful actors engaging in malevolent activities, which is not  
29 officially recognised as a salient cause” [1–5]. Beliefs in conspiracy theories have  
30 proliferated; especially, social crises stimulate and increase the prevalence [6,7]. Since late  
31 December 2019, misinformation and conspiracy theories about the coronavirus disease  
32 (COVID-19) pandemic have been spreading [6,8]. For example, there are various conspiracy  
33 theories about COVID-19: the virus was created to reduce the global population;  
34 pharmaceutical companies created and spread the virus to gain profit [9]. The worldwide  
35 prevalence of different types of conspiracy beliefs about COVID-19 varied from 5.0% to  
36 39.0% [9,10]. Most of the studies were from the US and European countries, but there were  
37 no studies on the prevalence of conspiracy beliefs about COVID-19 in Japan. Conspiracy  
38 theories about COVID-19 have undermined public health measures and induced a threat to  
39 people's health. Previous studies indicated that people who believe in conspiracy theories  
40 tended to be reluctant to get vaccinated and to disregard guidelines, such as social distancing,  
41 hand washing, and wearing a face mask [10–14]. The World Health Organization (WHO) has  
42 called for active steps to combat the “infodemic” [6,8].

43 Accumulated evidence has shed light on predictors of conspiracy beliefs about  
44 COVID-19 [10,12,14–16]. Prior research has indicated that belief in one conspiracy theory  
45 predicts holding other conspiracy beliefs simultaneously even if they are contradictory [17–  
46 20]. The reasons are considered to be a conspiratorial mindset, which is defined as a tendency  
47 to favour conspiracy explanations due to a bias against powerful actors and authorities [17–  
48 20]. Demographic variables, such as age and sex, are associated with the endorsement of  
49 COVID-19 conspiracy beliefs, but prior studies show conflicting results [10,14]. The  
50 variation might be due to cultural backgrounds [14]. Socioeconomic status, such as income

51 and education levels, predict conspiracy beliefs well [10,14]. In particular, individuals with  
52 lower educational attainment are more likely to believe the COVID-19 conspiracy theory  
53 [21]. The associations might be mediated through the interplay of thinking style and feelings  
54 of control [21]. Furthermore, exposure to low-level information might also be one of the  
55 explanation factors [14]. Conspiracy beliefs regarding COVID-19 are abundant on the  
56 internet, especially on social media. People shared conspiracy theories on a variety of media  
57 forms, such as YouTube, Instagram, and Twitter (currently known as X), and conspiracy  
58 theories were reinforced and amplified [6,15]. Social media is considered one source of  
59 conspiracy theories going viral [10,14,15], including Japan [22]. Furthermore, distrust in  
60 authorities hampers scientific communication. Scientific information is not directly  
61 transmitted from scientists, but relayed by governments and national health institutions. Trust  
62 in authorities can play an important role [10,14]. Feelings of fear and anxiety were associated  
63 with beliefs in conspiracy theories [10,14], because conspiracy theories can be interpreted as  
64 expressions of people's fear and anxieties [16]. Further, experiencing discrimination based on  
65 infections of COVID-19 can facilitate endorsing conspiracy beliefs. Indeed, in cases of HIV,  
66 British White gay men who experienced discrimination tended to hold HIV conspiracy  
67 theories [12,23].

68 As in other countries, COVID-19 conspiracy theories have proliferated in Japan. A  
69 Trump-inspired party (Sansei to), which advanced conspiracy theories about COVID-19 (e.g.  
70 laboratory origin narrative and big Pharma plot narratives), secured a seat in the House of  
71 Councillors in 2022 [24]. Conspiracy theories appear to be gaining popularity in Japan.  
72 However, the prevalence of conspiracy theories about COVID-19 has remained unclear. In  
73 addition, Japan has a different situation from other countries. Previous studies have found that  
74 individuals who rely on traditional media tend to be less inclined to believe in conspiracy  
75 theories [25,26]. However, even in traditional media such as TV news and newspapers, there

76 is a history of biased health reporting in Japan. For example, Japan's human papillomavirus  
77 vaccination rate is low, due to excessive reports of false side effects by traditional media [27].  
78 This situation might have facilitated distrust in government officials, healthcare professionals,  
79 and scientists. Indeed, Japan had relatively low trust in the government in 2020 among OECD  
80 countries [28]. However, there is a scarcity of research conducted in Japan focusing on  
81 correlates of conspiracy beliefs in COVID-19. This study aimed to estimate the prevalence of  
82 conspiracy beliefs about COVID-19 and explore factors associated with holding conspiracy  
83 beliefs about COVID-19 among a Japanese nationally representative sample.

## 84 **METHODS**

### 85 **Ethics approval and consent to participate**

86 The study protocol was reviewed and approved by the Research Ethics Committee of the  
87 Osaka International Cancer Institute (approved on June 19, 2020; approval number 20084).  
88 The authors assert that all procedures contributing to this work comply with the ethical  
89 standards of the relevant national and institutional committees on human experimentation and  
90 with the Helsinki Declaration of 1975, as revised in 2008. All participants provided written  
91 informed consent online before responding to the questionnaire. Participants received  
92 Rakuten points as a reward, which can be used for online shopping. The exact number of  
93 points is not disclosed at the request of an internet research agency (Rakuten Insight, Inc.,  
94 Tokyo, Japan).

### 95 **Study design, data sources, and participants**

96 This cross-sectional study used a dataset from the Japan COVID-19 and Society Internet  
97 Survey (JACSIS) (<https://jacsis-study.jp/>), which is a nationally representative web-based  
98 self-administered questionnaire survey. The JACSIS conducts a survey annually and targets  
99 approximately 2 million panellists, registering with an internet research agency (Rakuten  
100 Insight, Inc., Tokyo, Japan). In the JACSIS, the target population was individuals aged 15–79  
101 years who lived in Japan at a survey. The survey in this study was launched on 27 September  
102 2021 and concluded on 29 October 2021. Of all previous respondents of the previous wave of  
103 the JACSIS, an Internet research agency followed up with 33,081 individuals who were  
104 available to respond. From 27 September to 29 October 2021, a follow-up survey was  
105 conducted among them, resulting in responses from 22,838 individuals (response rate = 69%).  
106 Additionally, to achieve a total of 31,000 participants, an additional survey using the same  
107 questionnaire was conducted from 23 to 28 October 2021. Consequently, an extra 8,162

108 responses were collected.

109 Participants who provided fraudulent responses were excluded to ensure the quality  
110 of the data. Three exclusion criteria were employed to identify fraudulent responses: an  
111 incorrect answer to an attention check question ("Please select the second last option from the  
112 following choices."), straight-line responses regarding drug use, and regarding comorbidities,  
113 leading to the exclusion of 2,825 respondents. Thus, the Analytic population was 28,175.

## 114 **Dependent variable: The number of conspiracy beliefs regarding** 115 **COVID-19**

116 To assess conspiracy beliefs about COVID-19, we used three questions from the Oxford  
117 Coronavirus Explanations, Attitudes, and Narratives Survey (OCEANS) [29]. The questions  
118 were as follows: big Pharma created COVID-19 to profit from the vaccines; COVID-19 was  
119 created to force everyone to get vaccinated; the vaccine will be used to carry out mass  
120 sterilisation. The available response options were "1. Strongly agree", "2. Somewhat agree",  
121 "3. Neither agree nor disagree", "4. Somewhat disagree", and "5. Strongly disagree". We  
122 defined the first and second options as believing in conspiracy theories about COVID-19  
123 vaccines. The Cronbach's alpha was 0.889 and the Pearson's correlation matrix of the measure  
124 is shown in Appendix Table 1.

## 125 **Independent variables**

126 Based on previous studies [10,12,14–16], we selected variables potentially associated with  
127 COVID-19 conspiracy beliefs: general vaccine conspiracy beliefs, sociodemographic  
128 variables, information sources for COVID-19, trust in authorities, fear of COVID-19, and  
129 others.

### 130 **1. General vaccine conspiracy beliefs**

131 We calculated the number of conspiracy beliefs about general vaccines using a Vaccine

132 Conspiracy Beliefs Scale (VCBS) involving 7 items [30]. The questions of VCBS were  
133 below: vaccine safety data is often fabricated; immunizing children is harmful and this fact is  
134 covered up; pharmaceutical companies cover up the dangers of vaccines; people are deceived  
135 about vaccine efficacy; vaccine efficacy data is often fabricated; people are deceived about  
136 vaccine safety; the government is trying to cover up the link between vaccines and autism.  
137 Potential responses were a 7-point scale that ranged from "1. strongly disagree" to "7. strongly  
138 agree". We defined the fifth to seventh options as believing conspiracy theories about general  
139 vaccines. The Cronbach's alpha was 0.947 and the Pearson's correlation matrix of the measure  
140 is shown in Appendix Table 2.

## 141 **2. Sociodemographic variables**

142 We included age (16–19, 20–24, 25–29, 30–34, 35–39, 40–44, 45–49, 50–54, 55–59, 60–64,  
143 65–69, 70–74, and 75–81 years), sex (men and women), marital status (married, unmarried,  
144 widowed, and divorced), educational attainment (lower secondary school, upper secondary  
145 school, specialised training college [post-secondary courses], junior college and college of  
146 technology, university, and master's or doctor's degree), employment status (regular  
147 employee, temporary employee, self-employed, employer, student, unemployed or retired,  
148 housekeeper, and others), annual household income (0 to <2, 2 to <4, 4 to <5, 5 to <8, and  $\geq$ 8  
149 million yen), household financial assets (0 to <1, 1 to <4, 4 to <9, 9 to <20, and  $\geq$ 20 million  
150 yen), and household indebtedness (none, >0 to <2, and  $\geq$ 2 million yen).

## 151 **3. Information sources for COVID-19**

152 As for sources of information about COVID-19, we targeted the following 14 information  
153 sources: websites of government agencies, websites of research institutions, video sharing  
154 platforms (e.g. YouTube), LINE, Twitter, Facebook, Instagram, web news, newspapers,  
155 magazines, books, TV news, and tabloid TV shows. Sources of information for COVID-19  
156 were assessed by the following question: "Have you obtained medical information about



157 health topics, including COVID-19, from each of the following sources?" The options  
158 available for each source were "Yes" and "No". If respondents chose "Yes", they were asked  
159 that "How much do you trust the source of information you selected in the previous  
160 question?" The possible options were "1. Very trust", "2. Trust", "3. Somewhat trust", "4.  
161 Somewhat distrust", "5. Distrust", and "6. Distrust at all". We defined the first to third options  
162 as "trusted", and the fourth to sixth as "distrusted". Combining the former and latter questions,  
163 we defined three categories: "Not use", "Use but distrust", and "Use and trust".

#### 164 **4. Trust in authorities**

165 To measure the level of trust in authorities, we targeted the following 3 authorities: the  
166 government of Japan, prefectural administrations, and municipal administrations. Trust in  
167 authorities was measured using the following questions: the government is trustworthy; the  
168 administration of the municipality in which you currently live is trustworthy; the  
169 administration of the prefecture in which you currently live is trustworthy. The response  
170 options were "1. Agree", "2. Somewhat agree", "3. Somewhat disagree", and "4. Disagree".  
171 We defined the first and second options as "Trust", and the third and fourth as "Distrust".

#### 172 **5. Fear of COVID-19**

173 We used the Japanese Version of the Fear of Coronavirus Disease 2019 Scale (FCV-19S)  
174 [31]. This scale involves 7 items with a scale of 1 (strongly disagree) to 5 (strongly agree)  
175 points. The range of the scale was from 7 to 35 points. We adopted  $\geq 21$  of a cut-off point to  
176 identify psychological distress or difficulties in daily living due to the fear of COVID-19 [32].  
177 The Cronbach's alpha was 0.836 and the Pearson's correlation matrix of the measure is shown  
178 in Appendix Table 3.

#### 179 **6. Other covariates**

180 Experiencing discrimination regarding COVID-19 was obtained using a question: "In the last  
181 two months, have you experienced any of the following events? Felt discrimination related to

182 COVID-19." Available options were "1. Yes (experienced for the first time in the last two  
183 months)", "2. Yes (and had happened before)", "3. Never (but had happened before)", and "4.  
184 Never happened before". We defined the first to third options as "Experienced", and the last  
185 option as "Never". Additionally, we obtained a medical history of depression, other mental  
186 disorders, and coronavirus infections.

## 187 **Statistical analysis**

188 We employed linear regression analysis with a robust error variance to estimate the  
189 unstandardised coefficients (Bs) of the number of conspiracy beliefs regarding COVID-19.  
190 Although the distribution of a dependent variable is right-skewed, linear regression models  
191 can provide valid estimations [33]. A positive coefficient means holding more conspiracy  
192 theories while a negative coefficient means holding fewer conspiracy theories. We created  
193 two models: a crude model and a fully adjusted model using the simultaneous forced-entry  
194 method. The fully adjusted model included all independent variables simultaneously. To  
195 confirm the validity of the results from linear regression models, we also conducted a Poisson  
196 regression analysis with a robust error variance to estimate prevalence ratios for holding at  
197 least one conspiracy belief in COVID-19 [34].

198 To impute missing values, we used a k-nearest neighbour imputation (the R package  
199 "VIM") [35]. After the imputation, sampling weights were calculated using the raking method  
200 from the R package "anesrake" to match the proportions of age, sex, prefecture of residence,  
201 marital status, annual household income, and educational attainment from census data.  
202 Detailed information on the sampling weights has been described in Appendix Table 4. A P-  
203 value <0.05 (2-tailed) was considered statistically significant. All analyses were conducted in  
204 R (ver. 4.3.0; R Foundation for Statistical Computing, Vienna, Austria).

## 205 RESULTS

206 Table 1 shows basic participant characteristics. The median age of respondents was 50,  
207 ranging from 16 to 81. The proportion of women was 50.8%. After imputation and weighting,  
208 10.6% (95% confidence interval [CI] 10.1, 11.1) of the participants believed in one  
209 conspiracy theory regarding COVID-19 (OCEANS), 6.5% (95%CI 6.1, 6.9) in two, and 7.3%  
210 (95%CI 7.0, 7.8) in three. The prevalence of holding at least one conspiracy theory about  
211 COVID-19 was 24.4% (95%CI 23.7, 25.1). The detailed results of the original categories for  
212 three questions on COVID-19 conspiracy beliefs are shown in Appendix Table 5. On the  
213 other hand, participants who believed in at least one conspiracy theory regarding general  
214 vaccines (VCBS) constituted 33.6% (detailed results are shown in Appendix Table 6). The  
215 main source of COVID-19 information was TV news, trusted by 67.9% of the participants.  
216 Web news, the second source, garnered 48.0% trust. Distrust in the Japanese government was  
217 expressed by 62.7% of the participants.

218 Table 2 presents the weighted mean and proportions of the number of conspiracy  
219 beliefs regarding COVID-19. Among age groups, participants aged 16–19 years had the  
220 highest mean of conspiracy beliefs regarding COVID-19 (the weighted mean was 0.56),  
221 followed by 20–24 years (0.53) and 75–81 years (0.51). Women had a lesser number of  
222 conspiracy beliefs than men (0.39 vs 0.52). Participants who used and trusted TV news had a  
223 smaller number of conspiracy beliefs (0.43) than ones who did not use (0.54) and distrusted  
224 (0.48). Participants who trusted web news had a smaller number of conspiracy beliefs (-0.44)  
225 than those who did not use it (0.50), but a larger number than those who distrusted it.  
226 Paradoxically, participants who distrusted the Japanese government endorsed fewer  
227 conspiracy beliefs (0.40) compared to those who trusted the government (0.56). By contrast,  
228 there was no difference in the number of conspiracy beliefs between participants who trusted  
229 versus distrusted their prefectural and municipal administrations, respectively (prefectural

230 administration: trust 0.42, distrust 0.42; municipal administration: trust 0.42, distrust 0.42).

231 Table 3 shows the results of the crude and multivariable linear regression models  
232 with sampling weights after imputation. In the multivariable adjusted model, socioeconomic  
233 status was associated with harboring conspiracy theories about COVID-19. Lower secondary  
234 education and a master's or doctor's degree were associated with endorsing fewer conspiracy  
235 theories about COVID-19 compared with upper secondary education (lower secondary  
236 education: B -0.089, 95%CI -0.172, -0.006; master's or doctor's degree: B -0.066, 95%CI -  
237 0.126, -0.006). Temporary employees (B -0.051, 95%CI -0.095, -0.007), the self-employed (B  
238 -0.102, 95%CI -0.162, -0.042), the unemployed or retired (B -0.078, 95%CI -0.131, -0.025),  
239 and housekeepers (B -0.086, 95%CI -0.135, -0.037) held fewer conspiracy theories than  
240 regular employees. In addition, higher household income and assets were also associated with  
241 endorsing more conspiracy theories (annual household income of  $\geq 8$  million yen: B 0.069,  
242 95%CI 0.020, 0.117 vs. 4 to <5 million yen; household financial assets of 9 to <20 million  
243 yen: B 0.060, 95%CI 0.010, 0.109 vs. 0 to <1 million yen).

244 Information sources for COVID-19 were associated with holding conspiracy theories  
245 about COVID-19. Participants who used and trusted the websites of government agencies had  
246 fewer conspiracy beliefs than those who did not use the websites of government (B -0.109,  
247 95%CI -0.139, -0.079). On the other hand, participants who used and trusted video sharing  
248 platforms (e.g. YouTube) (B 0.089, 95%CI 0.038, 0.139), LINE (B 0.053, 95%CI 0.009,  
249 0.097), Facebook (B 0.089, 95%CI 0.000, 0.178), and Instagram (B 0.093, 95%CI 0.008,  
250 0.178) endorsed more conspiracy theories than those who did not use them. Participants who  
251 used and trusted, or distrusted web news held fewer conspiracy theories compared with those  
252 who did not use web news (use but distrust: B -0.080, 95%CI -0.123, -0.037; use and trust: B  
253 -0.068, 95%CI -0.102, -0.034). Participants who trusted the information from books held  
254 more conspiracy beliefs than those who did not use books (B 0.136, 95%CI 0.068, 0.204).

255 While participants who trusted TV news held fewer conspiracy theories (B -0.081, 95%CI -  
256 0.128, -0.035 vs. not used), those who trusted tabloid TV shows held more conspiracy  
257 theories (B 0.051, 95%CI 0.015, 0.087 vs. not used).

258 Trust in authorities was associated with endorsing conspiracy beliefs about COVID-  
259 19. Trust in the government of Japan was associated with holding more conspiracy theories  
260 (B 0.175, 95%CI 0.139, 0.211), compared to distrust. Trust in other authorities (the  
261 administration of the municipality and prefecture in which participants currently live) was not  
262 associated with holding conspiracy theories about COVID-19.

263 Feeling fear of COVID-19 was associated with holding more conspiracy beliefs  
264 about COVID-19 (B 0.145, 95%CI 0.115, 0.175 vs. none). A larger number of conspiracy  
265 theory beliefs regarding general vaccines were associated with holding more conspiracy  
266 theories about COVID-19. Participants who experienced discrimination against related to  
267 COVID-19 endorsed more conspiracy theories about COVID-19 (B 0.088, 95%CI 0.025,  
268 0.151 vs. none). Having a medical history of COVID-19 was associated with holding more  
269 conspiracy theories (diagnosed within the past year: 0.187, 95%CI 0.011, 0.363, and  
270 diagnosed before the past year: 0.169, 95%CI 0.024, 0.314).

271 Results from Poisson regression models with a robust error variance were consistent  
272 with the results from linear regression models (see Appendix Table 7).

## 273 **DISCUSSION**

274 From a nationwide survey involving 28,175 residents, we estimate that 24.4% of individuals  
275 in Japan held at least one conspiracy theory about COVID-19. Surprisingly, we found that the  
276 characteristics of respondents endorsing conspiracy beliefs were often the opposite of those  
277 reported in studies from western contexts. For example, people from higher socioeconomic  
278 backgrounds—such as higher income, higher wealth, and regular employment—were more  
279 likely to endorse conspiracy beliefs about COVID-19. Furthermore, 62.7% of respondents  
280 distrusted the government of Japan but they tended to hold fewer conspiracy theories about  
281 COVID-19.

### 282 **Interpretations of the results**

283 In our study, individuals who trusted the government were more likely to believe in  
284 conspiracy theories. This finding is in contrast to previous research in other countries [10,14]  
285 and is therefore unique. A prior study from JACSIS suggests that individuals with high trust  
286 in the government of Japan tended to practice preventive measures more often than those with  
287 low trust [36]. Our supplemental analysis also found that trust in the government of Japan  
288 were associated with low vaccine hesitancy (shown in Appendix Table 8). Therefore, we  
289 expected that individuals with high trust in the government would also disbelieve conspiracy  
290 theories. However, our results suggest the opposite—individuals sceptical of the government  
291 might have been more rational and critical about conspiracy theories, but not necessarily  
292 about preventive measures. In addition, we found that holding more COVID-19 conspiracy  
293 beliefs was associated with LOWER vaccine hesitancy (Appendix Table 8). This suggests  
294 that individuals who believed in conspiracy theories about COVID-19 were more likely to  
295 follow COVID-19 measures and trust the government. It indicates that COVID-19 conspiracy  
296 beliefs might reflect not only a conspiratorial mindset but also fear of COVID-19. Indeed, fear  
297 of COVID-19 was significantly correlated with COVID-19 conspiracy beliefs (Table 3).

298 However, if respondents simultaneously endorsed more general vaccine and COVID-19  
299 conspiracy beliefs, holding more COVID-19 conspiracy beliefs was associated with vaccine  
300 hesitancy (Appendix Table 9). This suggests that the Japanese government will not succeed in  
301 increasing vaccine uptake by combating conspiracy beliefs about COVID-19 alone. A broader  
302 range of conspiracy theories needs to be considered, including conspiracy theories about  
303 vaccines.

304         Prior studies also suggest that individuals with high socioeconomic status are more  
305 likely to disbelieve conspiracy theories [10,14]. Indeed, our results suggest that the highest  
306 educational attainment (a master's or doctor's degree) was associated with holding fewer  
307 conspiracy theories about COVID-19 compared with the middle educational attainment  
308 (upper secondary school, which is the most standard educational attainment in Japan).  
309 However, individuals with the lowest educational attainment (lower secondary school) also  
310 endorsed fewer conspiracy theories than those with middle educational attainment. In  
311 addition, higher socioeconomic position—based on higher income, higher wealth, and regular  
312 employment—were associated with endorsing more conspiracy theories about COVID-19.  
313 This may reflect the nature of Japanese society. In Japanese society, it has been previously  
314 noted that conspiracy beliefs often attract people from higher socioeconomic backgrounds  
315 [37]. For example, the religious cult, Aum Shinrikyo (responsible for the 1995 Tokyo subway  
316 sarin attack) promulgated antisemitic conspiracy theories, claiming that the government of  
317 Japan was secretly manipulated by Jews and Freemasons [38]. Members of the cult who  
318 planned and participated in the sarin gas attack were drawn from the elite including those with  
319 expertise in medicine, biology, chemistry, physics, and engineering [39]. Future research must  
320 identify the mechanisms behind this unique Japanese result.

321         The results regarding information sources in this study, as well as those of previous  
322 research [10,14,15], indicated that individuals trusting social media (Twitter, Facebook, and

323 Instagram) were more likely to believe in conspiracy theories while those who believed in  
324 mainstream sources such as government and traditional media news tended to endorse fewer  
325 conspiracy theories. This finding may be attributed to the proliferation of conspiracy theories  
326 on social media also in Japan [40]. However, it's important to note that the causal relationship  
327 between social media use and conspiracy beliefs is still controversial [5,15]. Regarding TV  
328 programs in Japan, trusting TV news was associated with disbelief in conspiracy theories.  
329 Although TV news has provided biased reports on vaccines; however, in the COVID-19 case,  
330 they seem to reflect the opinions of the government, authorities, and expert groups [41].  
331 However, tabloid TV shows featured celebrities, critics, journalists, and experts who were  
332 unfamiliar with public health [42]. Therefore, the observed difference between TV news and  
333 tabloid TV shows could be due to these features. Believing in information from books was  
334 associated with endorsing conspiracy theories about COVID-19. Misinformation, especially  
335 about healthcare, thrives on books in Japan [43–45]. Because these books were bestsellers,  
336 some people might have purchased and believed them. On the other hand, individuals who  
337 believe in conspiracy theories may have actively purchased books supporting their beliefs.  
338 The correlation between books and endorsing conspiracy theories might be attributed to the  
339 proliferation of books containing misinformation.

340 Younger and older people believed more conspiracy theories about COVID-19. We  
341 also observed sex differences in believing conspiracy theories. Experiencing discrimination  
342 related to COVID-19 was associated with belief in conspiracy theories. In a study of gay men  
343 in the UK, experiences of discrimination led to beliefs in conspiracy theories [12,23]. It's  
344 possible that in this case, experiencing discrimination makes individuals more likely to  
345 believe conspiracy theories. However, it could also be that those who believe in conspiracy  
346 theories simply over-reported instances of discrimination related to COVID-19. The diagnosis  
347 of COVID-19 was also associated with conspiracy beliefs. People who believe in conspiracy



348 theories tend to engage in higher-risk behaviours and report not following government  
349 guidelines [10–14]. Consequently, a higher proportion of COVID-19 patients could have been  
350 found to believe in conspiracy theories, suggesting an observed association.

## 351 **Strengths and limitations**

352 The limitations of this study should be noted. First, this study was cross-sectional, which  
353 means that a temporal relationship between the independent variables and the outcome  
354 remains unclear. Second, our examination of conspiracy theories about COVID-19 relied on  
355 three questions. The estimated prevalence of conspiracy beliefs about COVID-19 may be  
356 underestimated. However, the estimated prevalence was relatively similar to results from  
357 previous systematic reviews [9,10]. This study also has strengths. Unlike many previous  
358 studies with sample sizes over 200 [14], our study included 28,175 participants. In addition,  
359 the data includes a diverse range of Japanese residents, especially those with low  
360 socioeconomic status, employing sampling weights to improve external validity. Moreover,  
361 this study examined numerous potential associated factors, enabling a comprehensive  
362 assessment of the characteristics of individuals in Japan who hold conspiracy theories about  
363 COVID-19 and the results can be applied to the general population in Japan.

## 364 **Conclusions**

365 Conspiracy theories are a global problem and pose a public health risk. This study reported  
366 the prevalence of conspiracy beliefs about COVID-19 and associated factors in Japan. Some  
367 of the results were different, while some replicated findings from Western countries. Similar  
368 to findings from previous research, individuals who used social media as a source of  
369 information endorsed conspiracy theories. However, contrary to the results from Western  
370 countries, individuals with the lowest level of education were less likely to believe in  
371 conspiracy theories. Furthermore, higher socioeconomic Japanese—higher income, higher  
372 wealth, and regular employment—are more likely to endorse conspiracy beliefs about COVID-

373 19. Those who trusted the government were more likely to hold conspiracy beliefs. Our  
374 findings might support that combating the spread of conspiracy theories requires interventions  
375 that take into account cultural contexts.

## **DECLARATIONS**

### **Acknowledgements**

We thank all the participants who voluntarily shared their time and experience for the JACSIS.

### **Authors' contributions**

Study concept and design: Takahiro Tabuchi and Yukihiro Sato. Acquisition of data: Takahiro Tabuchi. Analysis and interpretation of data: All authors. Drafting of the manuscript: Yukihiro Sato. Critical revision of the manuscript for important intellectual content: All authors. Final approval of the version to be published: All authors Agreement to be accountable for all aspects of the work: All authors.

### **Availability of data and material**

The data used in this study are not available in a public repository because they contain personally identifiable or potentially sensitive patient information. Based on the regulations for ethical guidelines in Japan, the Research Ethics Committee of the Osaka International Cancer Institute has imposed restrictions on the dissemination of the data collected in this study. All data enquiries should be addressed to the person responsible for data management, Dr. Takahiro Tabuchi at the following e-mail address: [tabuchitak@gmail.com](mailto:tabuchitak@gmail.com)

## REFERENCES

1. Uscinski JE. The Study of Conspiracy Theories. *Argumenta*. 2017;3: 1–13.  
doi:10.23811/53.arg2017.usc
2. Uscinski JE, Parent JM. *American Conspiracy Theories*. Oxford University Press; 2014.  
doi:10.1093/acprof:oso/9780199351800.001.0001
3. Cassam Q. Conspiracy Theories. *Society*. 2023;60: 190–199. doi:10.1007/s12115-023-00816-1
4. R. X. Dentith M. The Problem of Conspiracism. *Argumenta*. 2017;3: 1–17.  
doi:10.23811/58.arg2017.den
5. Douglas KM, Sutton RM. What Are Conspiracy Theories? A Definitional Approach to Their Correlates, Consequences, and Communication. *Annu Rev Psychol*. 2023;74: 271–298. doi:10.1146/annurev-psych-032420-031329
6. Ball P, Maxmen A. The epic battle against coronavirus misinformation and conspiracy theories. *Nature*. 2020;581: 371–374. doi:10.1038/d41586-020-01452-z
7. van Prooijen J-W, Douglas KM. Conspiracy theories as part of history: The role of societal crisis situations. *Mem Stud*. 2017;10: 323–333. doi:10.1177/1750698017701615
8. World Health Organization. Infodemic. 2023 [cited 12 Oct 2023]. Available: <https://www.who.int/health-topics/infodemic>
9. Fotakis EA, Simou E. Belief in COVID-19 related conspiracy theories around the globe: A systematic review. *Health Policy*. 2023;137: 104903.

doi:10.1016/j.healthpol.2023.104903

10. Tsamakidis K, Tsiptsios D, Stubbs B, Ma R, Romano E, Mueller C, et al. Summarising data and factors associated with COVID-19 related conspiracy theories in the first year of the pandemic: a systematic review and narrative synthesis. *BMC Psychol.* 2022;10: 244. doi:10.1186/s40359-022-00959-6
11. Bierwiazzonek K, Gundersen AB, Kunst JR. The role of conspiracy beliefs for COVID-19 health responses: A meta-analysis. *Curr Opin Psychol.* 2022;46: 101346. doi:10.1016/j.copsyc.2022.101346
12. Jolley D, Marques MD, Cookson D. Shining a spotlight on the dangerous consequences of conspiracy theories. *Curr Opin Psychol.* 2022;47: 101363. doi:10.1016/j.copsyc.2022.101363
13. Ripp T, Röer JP. Systematic review on the association of COVID-19-related conspiracy belief with infection-preventive behavior and vaccination willingness. *BMC Psychol.* 2022;10: 66. doi:10.1186/s40359-022-00771-2
14. van Mulukom V, Pummerer LJ, Alper S, Bai H, Čavojová V, Farias J, et al. Antecedents and consequences of COVID-19 conspiracy beliefs: A systematic review. *Soc Sci Med.* 2022;301: 114912. doi:10.1016/j.socscimed.2022.114912
15. Dow BJ, Johnson AL, Wang CS, Whitson J, Menon T. The COVID-19 pandemic and the search for structure: Social media and conspiracy theories. *Soc Personal Psychol Compass.* 2021;15: e12636. doi:10.1111/spc3.12636

16. Pertwee E, Simas C, Larson HJ. An epidemic of uncertainty: rumors, conspiracy theories and vaccine hesitancy. *Nat Med.* 2022;28: 456–459. doi:10.1038/s41591-022-01728-z
17. Petrović M, Žeželj I. Both a bioweapon and a hoax: the curious case of contradictory conspiracy theories about COVID-19. *Think Reason.* 2023;29: 456–487. doi:10.1080/13546783.2022.2088618
18. Wood MJ, Douglas KM, Sutton RM. Dead and Alive: Beliefs in Contradictory Conspiracy Theories. *Soc Psychol Personal Sci.* 2012;3: 767–773. doi:10.1177/1948550611434786
19. Imhoff R, Lamberty P. A Bioweapon or a Hoax? The Link Between Distinct Conspiracy Beliefs About the Coronavirus Disease (COVID-19) Outbreak and Pandemic Behavior. *Soc Psychol Personal Sci.* 2020;11: 1110–1118. doi:10.1177/1948550620934692
20. Miller JM. Do COVID-19 Conspiracy Theory Beliefs Form a Monological Belief System? *Can J Polit Sci Can Sci Polit.* 2020/05/21 ed. 2020;53: 319–326. doi:10.1017/S0008423920000517
21. van Prooijen J-W. Why Education Predicts Decreased Belief in Conspiracy Theories. *Appl Cogn Psychol.* 2017;31: 50–58. doi:10.1002/acp.3301
22. Toriumi F, Sakaki T, Kobayashi T, Yoshida M. Anti-vaccine rabbit hole leads to political representation: the case of Twitter in Japan. *J Comput Soc Sci.* 2024. doi:10.1007/s42001-023-00241-8
23. Jolley D, Jaspal R. Discrimination, HIV conspiracy theories and pre-exposure prophylaxis acceptability in gay men. *Sex Health.* 2020;17: 525–533.

24. Murayama T, Matsui A, Miyazaki K, Matsubara Y, Sakurai Y. The Chance of Winning Election Impacts on Social Media Strategy. *Proc Int AAAI Conf Web Soc Media*. 2023;17: 674–685. doi:10.1609/icwsm.v17i1.22178
25. Enders AM, Uscinski JE, Seelig MI, Klofstad CA, Wuchty S, Funchion JR, et al. The Relationship Between Social Media Use and Beliefs in Conspiracy Theories and Misinformation. *Polit Behav*. 2023;45: 781–804. doi:10.1007/s11109-021-09734-6
26. De Coninck D, Frissen T, Matthijs K, d’Haenens L, Lits G, Champagne-Poirier O, et al. Beliefs in Conspiracy Theories and Misinformation About COVID-19: Comparative Perspectives on the Role of Anxiety, Depression and Exposure to and Trust in Information Sources. *Front Psychol*. 2021;12. doi:10.3389/fpsyg.2021.646394
27. Ikeda S, Ueda Y, Yagi A, Matsuzaki S, Kobayashi E, Kimura T, et al. HPV vaccination in Japan: what is happening in Japan? *Expert Rev Vaccines*. 2019;18: 323–325. doi:10.1080/14760584.2019.1584040
28. OECD. *Government at a Glance 2023*. 2023. Available: <https://www.oecd-ilibrary.org/content/publication/3d5c5d31-en>
29. Freeman D, Waite F, Rosebrock L, Petit A, Causier C, East A, et al. Coronavirus conspiracy beliefs, mistrust, and compliance with government guidelines in England. *Psychol Med*. 2020/05/21 ed. 2022;52: 251–263. doi:10.1017/S0033291720001890
30. Shapiro GK, Holding A, Perez S, Amsel R, Rosberger Z. Validation of the vaccine conspiracy beliefs scale. *Papillomavirus Res*. 2016;2: 167–172. doi:10.1016/j.pvr.2016.09.001

31. Midorikawa H, Aiba M, Lebowitz A, Taguchi T, Shiratori Y, Ogawa T, et al. Confirming validity of The Fear of COVID-19 Scale in Japanese with a nationwide large-scale sample. *PLOS ONE*. 2021;16: e0246840. doi:10.1371/journal.pone.0246840
32. Midorikawa H, Tachikawa H, Aiba M, Shiratori Y, Sugawara D, Kawakami N, et al. Proposed Cut-Off Score for the Japanese Version of the Fear of Coronavirus Disease 2019 Scale (FCV-19S): Evidence from a Large-Scale National Survey in Japan. *Int J Environ Res Public Health*. 2023;20. doi:10.3390/ijerph20010429
33. Schmidt AF, Finan C. Linear regression and the normality assumption. *J Clin Epidemiol*. 2018;98: 146–151. doi:10.1016/j.jclinepi.2017.12.006
34. Zou G. A Modified Poisson Regression Approach to Prospective Studies with Binary Data. *Am J Epidemiol*. 2004;159: 702–706. doi:10.1093/aje/kwh090
35. Kowarik A, Templ M. Imputation with the R Package VIM. *J Stat Softw*. 2016;74: 1–16. doi:10.18637/jss.v074.i07
36. Gotanda H, Miyawaki A, Tabuchi T, Tsugawa Y. Association Between Trust in Government and Practice of Preventive Measures During the COVID-19 Pandemic in Japan. *J Gen Intern Med*. 2021;36: 3471–3477. doi:10.1007/s11606-021-06959-3
37. Jun A. *Anata wo inbou ronzya ni suru kotoba* (in Japanese). Tōkyō: FOREST Publishing Company; 2021.
38. Ushiyama R. Aum Shinrikyo and religious terrorism in Japanese collective memory. *British Academy*; 2022. doi:10.5871/bacad/9780197267370.001.0001



39. Tanimoto T, Ozaki A, Harada K, Tani Y, Kami M. Involvement of doctors in Aum Shinrikyo. *The Lancet*. 2018;392: 1116. doi:10.1016/S0140-6736(18)31869-5
40. Kobayashi R, Takedomi Y, Nakayama Y, Suda T, Uno T, Hashimoto T, et al. Evolution of Public Opinion on COVID-19 Vaccination in Japan: Large-Scale Twitter Data Analysis. *J Med Internet Res*. 2022;24: e41928. doi:10.2196/41928
41. Yoneoka D, Eguchi A, Nomura S, Kawashima T, Tanoue Y, Murakami M, et al. Identification of optimum combinations of media channels for approaching COVID-19 vaccine unsure and unwilling groups in Japan. *Lancet Reg Health – West Pac*. 2022;18. doi:10.1016/j.lanwpc.2021.100330
42. Yamakoshi S, Mitani F. Mediated Experience of the COVID-19 Pandemic and the Politics of Emotion in Japan. 1st ed. *The COVID-19 Pandemic and Risks in East Asia*. 1st ed. London: Routledge; 2022. pp. 150–165. doi:10.4324/9781003286684-8
43. Poppe S, Havenstein L, Schäfer F. The Far Right and the Dissemination of COVID-19-Related Disinformation and Conspiracy Narratives in Japan: the Metapolitics of Kobayashi Yoshinori. *Asiascape Digit Asia*. 2023;10: 153–180.
44. Kanamori Y, Malone RE. Conveying misinformation: Top-ranked Japanese books on tobacco. *Tob Induc Dis*. 2011;9: 3. doi:10.1186/1617-9625-9-3
45. Takahashi K, Kanda H, Mizushima S. Growing Concerns With the Flow of Misinformation From Electronic Books. *Interact J Med Res*. 2013;2: e10. doi:10.2196/ijmr.2541

**Table 1. Basic characteristics of 28,175 participants**

| Variable                                                           | Response participants |         | Imputed population |         | Weighted imputed population |         |
|--------------------------------------------------------------------|-----------------------|---------|--------------------|---------|-----------------------------|---------|
|                                                                    | n=28,175              | (%)     | n=28,175           | (%)     | n=28,175                    | (%)     |
| <b>Dependent variable</b>                                          |                       |         |                    |         |                             |         |
| The number of conspiracy theory beliefs regarding COVID-19         |                       |         |                    |         |                             |         |
| 0                                                                  | 21,414                | (76.0%) | 21,414             | (76.0%) | 21,297                      | (75.6%) |
| 1                                                                  | 2,876                 | (10.2%) | 2,876              | (10.2%) | 2,974                       | (10.6%) |
| 2                                                                  | 1,830                 | (6.5%)  | 1,830              | (6.5%)  | 1,836                       | (6.5%)  |
| 3                                                                  | 2,055                 | (7.3%)  | 2,055              | (7.3%)  | 2,068                       | (7.3%)  |
| <b>Independent variable</b>                                        |                       |         |                    |         |                             |         |
| The number of conspiracy theory beliefs regarding general vaccines |                       |         |                    |         |                             |         |
| 0                                                                  | 18,798                | (66.7%) | 18,798             | (66.7%) | 18,712                      | (66.4%) |
| 1                                                                  | 3,021                 | (10.7%) | 3,021              | (10.7%) | 3,010                       | (10.7%) |
| 2                                                                  | 2,022                 | (7.2%)  | 2,022              | (7.2%)  | 2,067                       | (7.3%)  |
| 3                                                                  | 1,180                 | (4.2%)  | 1,180              | (4.2%)  | 1,203                       | (4.3%)  |
| 4                                                                  | 873                   | (3.1%)  | 873                | (3.1%)  | 865                         | (3.1%)  |
| 5                                                                  | 772                   | (2.7%)  | 772                | (2.7%)  | 768                         | (2.7%)  |
| 6                                                                  | 741                   | (2.6%)  | 741                | (2.6%)  | 779                         | (2.8%)  |
| 7                                                                  | 768                   | (2.7%)  | 768                | (2.7%)  | 770                         | (2.7%)  |
| Age (years old)                                                    |                       |         |                    |         |                             |         |
| 16–19                                                              | 573                   | (2.0%)  | 573                | (2.0%)  | 949                         | (3.4%)  |
| 20–24                                                              | 1,829                 | (6.5%)  | 1,829              | (6.5%)  | 1,801                       | (6.4%)  |
| 25–29                                                              | 1,797                 | (6.4%)  | 1,797              | (6.4%)  | 1,834                       | (6.5%)  |
| 30–34                                                              | 1,963                 | (7.0%)  | 1,963              | (7.0%)  | 1,885                       | (6.7%)  |
| 35–39                                                              | 2,186                 | (7.8%)  | 2,186              | (7.8%)  | 2,114                       | (7.5%)  |
| 40–44                                                              | 2,600                 | (9.2%)  | 2,600              | (9.2%)  | 2,350                       | (8.3%)  |
| 45–49                                                              | 2,854                 | (10.1%) | 2,854              | (10.1%) | 2,798                       | (9.9%)  |
| 50–54                                                              | 2,529                 | (9.0%)  | 2,529              | (9.0%)  | 2,661                       | (9.4%)  |
| 55–59                                                              | 2,256                 | (8.0%)  | 2,256              | (8.0%)  | 2,250                       | (8.0%)  |
| 60–64                                                              | 2,234                 | (7.9%)  | 2,234              | (7.9%)  | 2,125                       | (7.5%)  |
| 65–69                                                              | 2,648                 | (9.4%)  | 2,648              | (9.4%)  | 2,263                       | (8.0%)  |
| 70–74                                                              | 2,655                 | (9.4%)  | 2,655              | (9.4%)  | 2,781                       | (9.9%)  |
| 75–81                                                              | 2,051                 | (7.3%)  | 2,051              | (7.3%)  | 2,362                       | (8.4%)  |
| Sex                                                                |                       |         |                    |         |                             |         |
| Men                                                                | 13,870                | (49.2%) | 13,870             | (49.2%) | 13,986                      | (49.6%) |
| Women                                                              | 14,305                | (50.8%) | 14,305             | (50.8%) | 14,189                      | (50.4%) |
| Marital status                                                     |                       |         |                    |         |                             |         |
| Married                                                            | 16,969                | (60.2%) | 16,969             | (60.2%) | 17,472                      | (62.0%) |
| Unmarried                                                          | 8,322                 | (29.5%) | 8,322              | (29.5%) | 7,918                       | (28.1%) |
| Widowed                                                            | 1,001                 | (3.6%)  | 1,001              | (3.6%)  | 1,200                       | (4.3%)  |
| Divorced                                                           | 1,883                 | (6.7%)  | 1,883              | (6.7%)  | 1,585                       | (5.6%)  |
| Educational attainment                                             |                       |         |                    |         |                             |         |
| Lower Secondary School                                             | 392                   | (1.4%)  | 392                | (1.4%)  | 1,960                       | (7.0%)  |
| Upper Secondary School                                             | 7,592                 | (27.1%) | 7,638              | (27.1%) | 12,780                      | (45.4%) |
| Specialised Training College (Post-                                | 3,203                 | (11.4%) | 3,230              | (11.5%) | 2,775                       | (9.9%)  |

| Variable                                        | Response participants |         | Imputed population |         | Weighted imputed population |         |
|-------------------------------------------------|-----------------------|---------|--------------------|---------|-----------------------------|---------|
|                                                 | n=28,175              | (%)     | n=28,175           | (%)     | n=28,175                    | (%)     |
| <i>Secondary Courses)</i>                       |                       |         |                    |         |                             |         |
| <i>Junior College and College of Technology</i> | 3,045                 | (10.9%) | 3,065              | (10.9%) | 2,447                       | (8.7%)  |
| <i>University</i>                               | 12,368                | (44.2%) | 12,440             | (44.2%) | 7,421                       | (26.3%) |
| <i>Master's or doctor's degree</i>              | 1,409                 | (5.0%)  | 1,410              | (5.0%)  | 791                         | (2.8%)  |
| <i>(Missing)</i>                                | 166                   |         |                    |         |                             |         |
| <i>Employment status</i>                        |                       |         |                    |         |                             |         |
| <i>Regular employee</i>                         | 9,722                 | (34.5%) | 9,722              | (34.5%) | 9,231                       | (32.8%) |
| <i>Temporary employee</i>                       | 4,881                 | (17.3%) | 4,881              | (17.3%) | 4,976                       | (17.7%) |
| <i>Self-employed</i>                            | 1,732                 | (6.1%)  | 1,732              | (6.1%)  | 1,659                       | (5.9%)  |
| <i>Employer</i>                                 | 990                   | (3.5%)  | 990                | (3.5%)  | 980                         | (3.5%)  |
| <i>Student</i>                                  | 1,267                 | (4.5%)  | 1,267              | (4.5%)  | 1,387                       | (4.9%)  |
| <i>Unemployed or retired</i>                    | 4,636                 | (16.5%) | 4,636              | (16.5%) | 4,768                       | (16.9%) |
| <i>Housekeeper</i>                              | 4,711                 | (16.7%) | 4,711              | (16.7%) | 4,938                       | (17.5%) |
| <i>Others</i>                                   | 236                   | (0.8%)  | 236                | (0.8%)  | 235                         | (0.8%)  |
| <i>Annual household income</i>                  |                       |         |                    |         |                             |         |
| <i>0 to &lt;2 million yen</i>                   | 2,415                 | (10.9%) | 2,575              | (9.1%)  | 3,298                       | (11.7%) |
| <i>2 to &lt;4 million yen</i>                   | 5,738                 | (25.9%) | 7,142              | (25.3%) | 8,298                       | (29.5%) |
| <i>4 to &lt;5 million yen</i>                   | 2,868                 | (13.0%) | 3,908              | (13.9%) | 3,669                       | (13.0%) |
| <i>5 to &lt;8 million yen</i>                   | 6,082                 | (27.5%) | 8,530              | (30.3%) | 7,219                       | (25.6%) |
| <i>≥8 million yen</i>                           | 5,024                 | (22.7%) | 6,020              | (21.4%) | 5,692                       | (20.2%) |
| <i>(Missing)</i>                                | 6,048                 |         |                    |         |                             |         |
| <i>Household financial assets</i>               |                       |         |                    |         |                             |         |
| <i>0 to &lt;1 million yen</i>                   | 3,034                 | (17.5%) | 4,330              | (15.4%) | 5,144                       | (18.3%) |
| <i>1 to &lt;4 million yen</i>                   | 3,779                 | (21.8%) | 6,707              | (23.8%) | 7,434                       | (26.4%) |
| <i>4 to &lt;9 million yen</i>                   | 3,440                 | (19.9%) | 6,594              | (23.4%) | 6,245                       | (22.2%) |
| <i>9 to &lt;20 million yen</i>                  | 3,247                 | (18.7%) | 5,349              | (19.0%) | 4,931                       | (17.5%) |
| <i>≥20 million yen</i>                          | 3,825                 | (22.1%) | 5,195              | (18.4%) | 4,422                       | (15.7%) |
| <i>(Missing)</i>                                | 10,850                |         |                    |         |                             |         |
| <i>Household indebtedness</i>                   |                       |         |                    |         |                             |         |
| <i>None</i>                                     | 15,722                | (71.5%) | 20,145             | (71.5%) | 19,914                      | (70.7%) |
| <i>&gt;0 to &lt;2 million yen</i>               | 1,510                 | (6.9%)  | 2,005              | (7.1%)  | 2,236                       | (7.9%)  |
| <i>≥2 million yen</i>                           | 4,771                 | (21.7%) | 6,025              | (21.4%) | 6,025                       | (21.4%) |
| <i>(Missing)</i>                                | 6,172                 |         |                    |         |                             |         |
| <i>Information source for COVID-19:</i>         |                       |         |                    |         |                             |         |
| <i>Websites of government agencies</i>          |                       |         |                    |         |                             |         |
| <i>Not use</i>                                  | 15,467                | (54.9%) | 15,467             | (54.9%) | 16,182                      | (57.4%) |
| <i>Use but distrust</i>                         | 827                   | (2.9%)  | 827                | (2.9%)  | 850                         | (3.0%)  |
| <i>Use and trust</i>                            | 11,881                | (42.2%) | 11,881             | (42.2%) | 11,143                      | (39.5%) |
| <i>Information source for COVID-19:</i>         |                       |         |                    |         |                             |         |
| <i>Websites of research institutions</i>        |                       |         |                    |         |                             |         |
| <i>Not use</i>                                  | 25,179                | (89.4%) | 25,179             | (89.4%) | 25,468                      | (90.4%) |
| <i>Use but distrust</i>                         | 217                   | (0.8%)  | 217                | (0.8%)  | 224                         | (0.8%)  |
| <i>Use and trust</i>                            | 2,779                 | (9.9%)  | 2,779              | (9.9%)  | 2,484                       | (8.8%)  |
| <i>Information source for COVID-19:</i>         |                       |         |                    |         |                             |         |
| <i>Video sharing platforms (e.g. YouTube)</i>   |                       |         |                    |         |                             |         |

| Variable                                    | Response participants |         | Imputed population |         | Weighted imputed population |         |
|---------------------------------------------|-----------------------|---------|--------------------|---------|-----------------------------|---------|
|                                             | n=28,175              | (%)     | n=28,175           | (%)     | n=28,175                    | (%)     |
| <i>Not use</i>                              | 23,647                | (83.9%) | 23,647             | (83.9%) | 23,534                      | (83.5%) |
| <i>Use but distrust</i>                     | 1,229                 | (4.4%)  | 1,229              | (4.4%)  | 1,225                       | (4.3%)  |
| <i>Use and trust</i>                        | 3,299                 | (11.7%) | 3,299              | (11.7%) | 3,416                       | (12.1%) |
| Information source for COVID-19: LINE       |                       |         |                    |         |                             |         |
| <i>Not use</i>                              | 23,218                | (82.4%) | 23,218             | (82.4%) | 23,040                      | (81.8%) |
| <i>Use but distrust</i>                     | 845                   | (3.0%)  | 845                | (3.0%)  | 862                         | (3.1%)  |
| <i>Use and trust</i>                        | 4,112                 | (14.6%) | 4,112              | (14.6%) | 4,273                       | (15.2%) |
| Information source for COVID-19: Twitter    |                       |         |                    |         |                             |         |
| <i>Not use</i>                              | 24,019                | (85.2%) | 24,019             | (85.2%) | 24,080                      | (85.5%) |
| <i>Use but distrust</i>                     | 1,431                 | (5.1%)  | 1,431              | (5.1%)  | 1,348                       | (4.8%)  |
| <i>Use and trust</i>                        | 2,725                 | (9.7%)  | 2,725              | (9.7%)  | 2,747                       | (9.8%)  |
| Information source for COVID-19: Facebook   |                       |         |                    |         |                             |         |
| <i>Not use</i>                              | 26,615                | (94.5%) | 26,615             | (94.5%) | 26,605                      | (94.4%) |
| <i>Use but distrust</i>                     | 461                   | (1.6%)  | 461                | (1.6%)  | 455                         | (1.6%)  |
| <i>Use and trust</i>                        | 1,099                 | (3.9%)  | 1,099              | (3.9%)  | 1,115                       | (4.0%)  |
| Information source for COVID-19: Instagram  |                       |         |                    |         |                             |         |
| <i>Not use</i>                              | 26,474                | (94.0%) | 26,474             | (94.0%) | 26,362                      | (93.6%) |
| <i>Use but distrust</i>                     | 493                   | (1.7%)  | 493                | (1.7%)  | 518                         | (1.8%)  |
| <i>Use and trust</i>                        | 1,208                 | (4.3%)  | 1,208              | (4.3%)  | 1,296                       | (4.6%)  |
| Information source for COVID-19: Web news   |                       |         |                    |         |                             |         |
| <i>Not use</i>                              | 9,828                 | (34.9%) | 9,828              | (34.9%) | 10,350                      | (36.7%) |
| <i>Use but distrust</i>                     | 4,556                 | (16.2%) | 4,556              | (16.2%) | 4,308                       | (15.3%) |
| <i>Use and trust</i>                        | 13,791                | (48.9%) | 13,791             | (48.9%) | 13,517                      | (48.0%) |
| Information source for COVID-19: Newspapers |                       |         |                    |         |                             |         |
| <i>Not use</i>                              | 15,986                | (56.7%) | 15,986             | (56.7%) | 16,996                      | (60.3%) |
| <i>Use but distrust</i>                     | 829                   | (2.9%)  | 829                | (2.9%)  | 772                         | (2.7%)  |
| <i>Use and trust</i>                        | 11,360                | (40.3%) | 11,360             | (40.3%) | 10,407                      | (36.9%) |
| Information source for COVID-19: Magazines  |                       |         |                    |         |                             |         |
| <i>Not use</i>                              | 25,105                | (89.1%) | 25,105             | (89.1%) | 25,338                      | (89.9%) |
| <i>Use but distrust</i>                     | 560                   | (2.0%)  | 560                | (2.0%)  | 512                         | (1.8%)  |
| <i>Use and trust</i>                        | 2,510                 | (8.9%)  | 2,510              | (8.9%)  | 2,325                       | (8.3%)  |
| Information source for COVID-19: Books      |                       |         |                    |         |                             |         |
| <i>Not use</i>                              | 25,840                | (91.7%) | 25,840             | (91.7%) | 26,140                      | (92.8%) |
| <i>Use but distrust</i>                     | 267                   | (0.9%)  | 267                | (0.9%)  | 254                         | (0.9%)  |
| <i>Use and trust</i>                        | 2,068                 | (7.3%)  | 2,068              | (7.3%)  | 1,781                       | (6.3%)  |
| Information source for COVID-19: TV news    |                       |         |                    |         |                             |         |
| <i>Not use</i>                              | 5,770                 | (20.5%) | 5,770              | (20.5%) | 6,261                       | (22.2%) |
| <i>Use but distrust</i>                     | 2,892                 | (10.3%) | 2,892              | (10.3%) | 2,778                       | (9.9%)  |

| Variable                                  | Response participants |         | Imputed population |         | Weighted imputed population |         |
|-------------------------------------------|-----------------------|---------|--------------------|---------|-----------------------------|---------|
|                                           | n=28,175              | (%)     | n=28,175           | (%)     | n=28,175                    | (%)     |
| <i>Use and trust</i>                      | 19,513                | (69.3%) | 19,513             | (69.3%) | 19,136                      | (67.9%) |
| Information source for COVID-19:          |                       |         |                    |         |                             |         |
| Tabloid TV shows                          |                       |         |                    |         |                             |         |
| <i>Not use</i>                            | 11,502                | (40.8%) | 11,502             | (40.8%) | 11,572                      | (41.1%) |
| <i>Use but distrust</i>                   | 3,710                 | (13.2%) | 3,710              | (13.2%) | 3,517                       | (12.5%) |
| <i>Use and trust</i>                      | 12,963                | (46.0%) | 12,963             | (46.0%) | 13,086                      | (46.4%) |
| Trust in the government of Japan          |                       |         |                    |         |                             |         |
| <i>Distrust</i>                           | 17,596                | (62.5%) | 17,596             | (62.5%) | 17,674                      | (62.7%) |
| <i>Trust</i>                              | 10,579                | (37.5%) | 10,579             | (37.5%) | 10,501                      | (37.3%) |
| Trust in the prefectural administration   |                       |         |                    |         |                             |         |
| <i>Distrust</i>                           | 13,350                | (47.4%) | 13,350             | (47.4%) | 13,603                      | (48.3%) |
| <i>Trust</i>                              | 14,825                | (52.6%) | 14,825             | (52.6%) | 14,572                      | (51.7%) |
| Trust in the municipal administration     |                       |         |                    |         |                             |         |
| <i>Distrust</i>                           | 12,993                | (46.1%) | 12,993             | (46.1%) | 13,359                      | (47.4%) |
| <i>Trust</i>                              | 15,182                | (53.9%) | 15,182             | (53.9%) | 14,816                      | (52.6%) |
| Fear of COVID-19                          |                       |         |                    |         |                             |         |
| <i>None</i>                               | 18,059                | (64.1%) | 18,059             | (64.1%) | 17,626                      | (62.6%) |
| <i>Feeling</i>                            | 10,116                | (35.9%) | 10,116             | (35.9%) | 10,549                      | (37.4%) |
| Discriminated against related to COVID-19 |                       |         |                    |         |                             |         |
| <i>Never</i>                              | 26,563                | (94.3%) | 26,563             | (94.3%) | 26,516                      | (94.1%) |
| <i>Experienced</i>                        | 1,612                 | (5.7%)  | 1,612              | (5.7%)  | 1,659                       | (5.9%)  |
| Medical history of COVID-19               |                       |         |                    |         |                             |         |
| <i>None</i>                               | 27,663                | (98.2%) | 27,663             | (98.2%) | 27,568                      | (97.8%) |
| <i>Diagnosed within the past year</i>     | 260                   | (0.9%)  | 260                | (0.9%)  | 348                         | (1.2%)  |
| <i>Diagnosed before the past year</i>     | 252                   | (0.9%)  | 252                | (0.9%)  | 258                         | (0.9%)  |
| Medical history of depression             |                       |         |                    |         |                             |         |
| <i>Never</i>                              | 24,691                | (87.6%) | 24,691             | (87.6%) | 24,603                      | (87.3%) |
| <i>Former</i>                             | 2,136                 | (7.6%)  | 2,136              | (7.6%)  | 2,101                       | (7.5%)  |
| <i>Current</i>                            | 1,348                 | (4.8%)  | 1,348              | (4.8%)  | 1,470                       | (5.2%)  |
| Medical history of other mental disorders |                       |         |                    |         |                             |         |
| <i>Never</i>                              | 25,647                | (91.0%) | 25,647             | (91.0%) | 25,527                      | (90.6%) |
| <i>Former</i>                             | 1,229                 | (4.4%)  | 1,229              | (4.4%)  | 1,317                       | (4.7%)  |
| <i>Current</i>                            | 1,299                 | (4.6%)  | 1,299              | (4.6%)  | 1,331                       | (4.7%)  |

**Table 2. Weighted means and proportions of the number of COVID-19 conspiracy beliefs after imputation**

| Variable                                                           | Mean | The number of conspiracy theory beliefs regarding COVID-19 |         |       |         |       |         |       |         |
|--------------------------------------------------------------------|------|------------------------------------------------------------|---------|-------|---------|-------|---------|-------|---------|
|                                                                    |      | None                                                       |         | One   |         | Two   |         | Three |         |
|                                                                    |      | n                                                          | (%)     | n     | (%)     | n     | (%)     | n     | (%)     |
| The number of conspiracy theory beliefs regarding general vaccines |      |                                                            |         |       |         |       |         |       |         |
| 0                                                                  | 0.41 | 14,865                                                     | (79.4%) | 1,503 | (8.0%)  | 912   | (4.9%)  | 1,432 | (7.7%)  |
| 1                                                                  | 0.48 | 2,160                                                      | (71.8%) | 436   | (14.5%) | 240   | (8.0%)  | 174   | (5.8%)  |
| 2                                                                  | 0.45 | 1,447                                                      | (70.0%) | 377   | (18.2%) | 176   | (8.5%)  | 68    | (3.3%)  |
| 3                                                                  | 0.45 | 846                                                        | (70.3%) | 218   | (18.1%) | 92    | (7.6%)  | 47    | (3.9%)  |
| 4                                                                  | 0.56 | 566                                                        | (65.4%) | 149   | (17.2%) | 115   | (13.3%) | 36    | (4.1%)  |
| 5                                                                  | 0.50 | 542                                                        | (70.5%) | 114   | (14.9%) | 70    | (9.1%)  | 42    | (5.5%)  |
| 6                                                                  | 0.75 | 458                                                        | (58.7%) | 119   | (15.3%) | 138   | (17.7%) | 64    | (8.3%)  |
| 7                                                                  | 1.12 | 413                                                        | (53.7%) | 58    | (7.5%)  | 94    | (12.3%) | 205   | (26.6%) |
| Age (years old)                                                    |      |                                                            |         |       |         |       |         |       |         |
| 16–19                                                              | 0.56 | 665                                                        | (70.1%) | 119   | (12.6%) | 84    | (8.9%)  | 80    | (8.5%)  |
| 20–24                                                              | 0.53 | 1,252                                                      | (69.5%) | 289   | (16.1%) | 123   | (6.8%)  | 138   | (7.6%)  |
| 25–29                                                              | 0.48 | 1,333                                                      | (72.7%) | 248   | (13.5%) | 121   | (6.6%)  | 133   | (7.3%)  |
| 30–34                                                              | 0.50 | 1,361                                                      | (72.2%) | 242   | (12.8%) | 148   | (7.8%)  | 134   | (7.1%)  |
| 35–39                                                              | 0.45 | 1,608                                                      | (76.0%) | 214   | (10.1%) | 146   | (6.9%)  | 147   | (7.0%)  |
| 40–44                                                              | 0.44 | 1,822                                                      | (77.5%) | 209   | (8.9%)  | 138   | (5.9%)  | 180   | (7.7%)  |
| 45–49                                                              | 0.43 | 2,165                                                      | (77.4%) | 264   | (9.4%)  | 174   | (6.2%)  | 195   | (7.0%)  |
| 50–54                                                              | 0.39 | 2,119                                                      | (79.6%) | 202   | (7.6%)  | 171   | (6.4%)  | 168   | (6.3%)  |
| 55–59                                                              | 0.42 | 1,779                                                      | (79.1%) | 177   | (7.9%)  | 117   | (5.2%)  | 177   | (7.9%)  |
| 60–64                                                              | 0.45 | 1,649                                                      | (77.6%) | 177   | (8.3%)  | 115   | (5.4%)  | 185   | (8.7%)  |
| 65–69                                                              | 0.44 | 1,749                                                      | (77.3%) | 208   | (9.2%)  | 121   | (5.3%)  | 185   | (8.2%)  |
| 70–74                                                              | 0.43 | 2,106                                                      | (75.7%) | 314   | (11.3%) | 189   | (6.8%)  | 172   | (6.2%)  |
| 75–81                                                              | 0.51 | 1,691                                                      | (71.6%) | 310   | (13.1%) | 189   | (8.0%)  | 173   | (7.3%)  |
| Sex                                                                |      |                                                            |         |       |         |       |         |       |         |
| Men                                                                | 0.52 | 10,163                                                     | (72.7%) | 1,559 | (11.2%) | 1,031 | (7.4%)  | 1,233 | (8.8%)  |
| Women                                                              | 0.39 | 11,134                                                     | (78.5%) | 1,415 | (10.0%) | 805   | (5.7%)  | 835   | (5.9%)  |
| Marital status                                                     |      |                                                            |         |       |         |       |         |       |         |
| Married                                                            | 0.46 | 13,199                                                     | (75.5%) | 1,807 | (10.3%) | 1,128 | (6.5%)  | 1,338 | (7.7%)  |
| Unmarried                                                          | 0.45 | 5,957                                                      | (75.2%) | 893   | (11.3%) | 509   | (6.4%)  | 559   | (7.1%)  |
| Widowed                                                            | 0.44 | 901                                                        | (75.1%) | 135   | (11.2%) | 103   | (8.6%)  | 61    | (5.1%)  |
| Divorced                                                           | 0.42 | 1,241                                                      | (78.3%) | 139   | (8.8%)  | 95    | (6.0%)  | 110   | (6.9%)  |
| Educational attainment                                             |      |                                                            |         |       |         |       |         |       |         |
| Lower Secondary School                                             | 0.39 | 1,545                                                      | (78.8%) | 190   | (9.7%)  | 105   | (5.4%)  | 120   | (6.1%)  |
| Upper Secondary School                                             | 0.45 | 9,679                                                      | (75.7%) | 1,369 | (10.7%) | 796   | (6.2%)  | 937   | (7.3%)  |
| Specialised Training College (Post-Secondary Courses)              | 0.46 | 2,098                                                      | (75.6%) | 290   | (10.4%) | 184   | (6.6%)  | 204   | (7.3%)  |
| Junior College and College of Technology                           | 0.44 | 1,878                                                      | (76.7%) | 240   | (9.8%)  | 155   | (6.3%)  | 174   | (7.1%)  |
| University                                                         | 0.49 | 5,483                                                      | (73.9%) | 809   | (10.9%) | 546   | (7.3%)  | 582   | (7.8%)  |
| Master's or doctor's degree                                        | 0.42 | 614                                                        | (77.6%) | 75    | (9.5%)  | 51    | (6.4%)  | 51    | (6.4%)  |
| Employment status                                                  |      |                                                            |         |       |         |       |         |       |         |

| Variable                                                                | The number of conspiracy theory beliefs regarding COVID-19 |        |         |       |         |       |         |       |         |
|-------------------------------------------------------------------------|------------------------------------------------------------|--------|---------|-------|---------|-------|---------|-------|---------|
|                                                                         | Mean                                                       | None   |         | One   |         | Two   |         | Three |         |
|                                                                         |                                                            | n      | (%)     | n     | (%)     | n     | (%)     | n     | (%)     |
| <i>Regular employee</i>                                                 | 0.51                                                       | 6,771  | (73.3%) | 1,016 | (11.0%) | 679   | (7.4%)  | 765   | (8.3%)  |
| <i>Temporary employee</i>                                               | 0.41                                                       | 3,889  | (78.2%) | 464   | (9.3%)  | 278   | (5.6%)  | 345   | (6.9%)  |
| <i>Self-employed</i>                                                    | 0.44                                                       | 1,281  | (77.2%) | 157   | (9.4%)  | 100   | (6.0%)  | 122   | (7.3%)  |
| <i>Employer</i>                                                         | 0.58                                                       | 680    | (69.4%) | 132   | (13.4%) | 68    | (7.0%)  | 100   | (10.2%) |
| <i>Student</i>                                                          | 0.52                                                       | 997    | (71.9%) | 178   | (12.8%) | 99    | (7.1%)  | 113   | (8.2%)  |
| <i>Unemployed or retired</i>                                            | 0.45                                                       | 3,586  | (75.2%) | 535   | (11.2%) | 310   | (6.5%)  | 337   | (7.1%)  |
| <i>Housekeeper</i>                                                      | 0.38                                                       | 3,916  | (79.3%) | 459   | (9.3%)  | 288   | (5.8%)  | 276   | (5.6%)  |
| <i>Others</i>                                                           | 0.38                                                       | 178    | (75.8%) | 34    | (14.5%) | 14    | (5.8%)  | 9     | (4.0%)  |
| Annual household income                                                 |                                                            |        |         |       |         |       |         |       |         |
| <i>0 to &lt;2 million yen</i>                                           | 0.44                                                       | 2,497  | (75.7%) | 365   | (11.1%) | 211   | (6.4%)  | 224   | (6.8%)  |
| <i>2 to &lt;4 million yen</i>                                           | 0.45                                                       | 6,264  | (75.5%) | 922   | (11.1%) | 531   | (6.4%)  | 581   | (7.0%)  |
| <i>4 to &lt;5 million yen</i>                                           | 0.42                                                       | 2,835  | (77.3%) | 359   | (9.8%)  | 246   | (6.7%)  | 229   | (6.2%)  |
| <i>5 to &lt;8 million yen</i>                                           | 0.44                                                       | 5,535  | (76.7%) | 717   | (9.9%)  | 432   | (6.0%)  | 534   | (7.4%)  |
| <i>≥8 million yen</i>                                                   | 0.52                                                       | 4,166  | (73.2%) | 611   | (10.7%) | 416   | (7.3%)  | 500   | (8.8%)  |
| Household financial assets                                              |                                                            |        |         |       |         |       |         |       |         |
| <i>0 to &lt;1 million yen</i>                                           | 0.41                                                       | 3,991  | (77.6%) | 535   | (10.4%) | 275   | (5.3%)  | 343   | (6.7%)  |
| <i>1 to &lt;4 million yen</i>                                           | 0.48                                                       | 5,570  | (74.9%) | 767   | (10.3%) | 522   | (7.0%)  | 575   | (7.7%)  |
| <i>4 to &lt;9 million yen</i>                                           | 0.46                                                       | 4,690  | (75.1%) | 692   | (11.1%) | 398   | (6.4%)  | 465   | (7.4%)  |
| <i>9 to &lt;20 million yen</i>                                          | 0.50                                                       | 3,617  | (73.4%) | 544   | (11.0%) | 375   | (7.6%)  | 395   | (8.0%)  |
| <i>≥20 million yen</i>                                                  | 0.42                                                       | 3,430  | (77.6%) | 436   | (9.9%)  | 266   | (6.0%)  | 290   | (6.6%)  |
| Household indebtedness                                                  |                                                            |        |         |       |         |       |         |       |         |
| <i>None</i>                                                             | 0.45                                                       | 15,192 | (76.3%) | 2,014 | (10.1%) | 1,237 | (6.2%)  | 1,471 | (7.4%)  |
| <i>&gt;0 to &lt;2 million yen</i>                                       | 0.47                                                       | 1,642  | (73.5%) | 281   | (12.6%) | 174   | (7.8%)  | 138   | (6.2%)  |
| <i>≥2 million yen</i>                                                   | 0.48                                                       | 4,462  | (74.1%) | 678   | (11.3%) | 426   | (7.1%)  | 458   | (7.6%)  |
| Information source for COVID-19: Websites of government agencies        |                                                            |        |         |       |         |       |         |       |         |
| <i>Not use</i>                                                          | 0.48                                                       | 12,103 | (74.8%) | 1,747 | (10.8%) | 1,035 | (6.4%)  | 1,298 | (8.0%)  |
| <i>Use but distrust</i>                                                 | 0.66                                                       | 553    | (65.1%) | 111   | (13.1%) | 106   | (12.5%) | 79    | (9.3%)  |
| <i>Use and trust</i>                                                    | 0.41                                                       | 8,642  | (77.5%) | 1,116 | (10.0%) | 695   | (6.2%)  | 690   | (6.2%)  |
| Information source for COVID-19: Websites of research institutions      |                                                            |        |         |       |         |       |         |       |         |
| <i>Not use</i>                                                          | 0.44                                                       | 19,433 | (76.3%) | 2,638 | (10.4%) | 1,596 | (6.3%)  | 1,801 | (7.1%)  |
| <i>Use but distrust</i>                                                 | 0.79                                                       | 113    | (50.6%) | 62    | (27.5%) | 31    | (14.0%) | 18    | (8.0%)  |
| <i>Use and trust</i>                                                    | 0.58                                                       | 1,752  | (70.5%) | 275   | (11.1%) | 209   | (8.4%)  | 249   | (10.0%) |
| Information source for COVID-19: Video sharing platforms (e.g. YouTube) |                                                            |        |         |       |         |       |         |       |         |
| <i>Not use</i>                                                          | 0.43                                                       | 18,100 | (76.9%) | 2,405 | (10.2%) | 1,459 | (6.2%)  | 1,570 | (6.7%)  |
| <i>Use but distrust</i>                                                 | 0.50                                                       | 889    | (72.5%) | 156   | (12.8%) | 88    | (7.2%)  | 92    | (7.5%)  |
| <i>Use and trust</i>                                                    | 0.65                                                       | 2,308  | (67.6%) | 413   | (12.1%) | 289   | (8.5%)  | 405   | (11.9%) |
| Information source for COVID-19: LINE                                   |                                                            |        |         |       |         |       |         |       |         |
| <i>Not use</i>                                                          | 0.43                                                       | 17,705 | (76.8%) | 2,314 | (10.0%) | 1,426 | (6.2%)  | 1,596 | (6.9%)  |
| <i>Use but distrust</i>                                                 | 0.57                                                       | 592    | (68.6%) | 124   | (14.3%) | 72    | (8.3%)  | 75    | (8.7%)  |

| Variable                                          | The number of conspiracy theory beliefs regarding COVID-19 |        |         |       |         |       |         |       |         |
|---------------------------------------------------|------------------------------------------------------------|--------|---------|-------|---------|-------|---------|-------|---------|
|                                                   | Mean                                                       | None   |         | One   |         | Two   |         | Three |         |
|                                                   |                                                            | n      | (%)     | n     | (%)     | n     | (%)     | n     | (%)     |
| <i>Use and trust</i>                              | 0.56                                                       | 3,001  | (70.2%) | 537   | (12.6%) | 339   | (7.9%)  | 397   | (9.3%)  |
| Information source for COVID-19: Twitter          |                                                            |        |         |       |         |       |         |       |         |
| <i>Not use</i>                                    | 0.44                                                       | 18,417 | (76.5%) | 2,465 | (10.2%) | 1,512 | (6.3%)  | 1,686 | (7.0%)  |
| <i>Use but distrust</i>                           | 0.48                                                       | 990    | (73.5%) | 165   | (12.2%) | 94    | (7.0%)  | 98    | (7.3%)  |
| <i>Use and trust</i>                              | 0.60                                                       | 1,890  | (68.8%) | 344   | (12.5%) | 230   | (8.3%)  | 283   | (10.3%) |
| Information source for COVID-19: Facebook         |                                                            |        |         |       |         |       |         |       |         |
| <i>Not use</i>                                    | 0.44                                                       | 20,336 | (76.4%) | 2,723 | (10.2%) | 1,673 | (6.3%)  | 1,873 | (7.0%)  |
| <i>Use but distrust</i>                           | 0.66                                                       | 284    | (62.4%) | 85    | (18.6%) | 44    | (9.6%)  | 43    | (9.4%)  |
| <i>Use and trust</i>                              | 0.77                                                       | 677    | (60.8%) | 167   | (15.0%) | 119   | (10.7%) | 152   | (13.6%) |
| Information source for COVID-19: Instagram        |                                                            |        |         |       |         |       |         |       |         |
| <i>Not use</i>                                    | 0.44                                                       | 20,171 | (76.5%) | 2,676 | (10.2%) | 1,650 | (6.3%)  | 1,865 | (7.1%)  |
| <i>Use but distrust</i>                           | 0.60                                                       | 328    | (63.4%) | 108   | (20.8%) | 41    | (7.8%)  | 41    | (8.0%)  |
| <i>Use and trust</i>                              | 0.74                                                       | 798    | (61.6%) | 191   | (14.7%) | 145   | (11.2%) | 161   | (12.5%) |
| Information source for COVID-19: Web news         |                                                            |        |         |       |         |       |         |       |         |
| <i>Not use</i>                                    | 0.50                                                       | 7,631  | (73.7%) | 1,151 | (11.1%) | 689   | (6.7%)  | 880   | (8.5%)  |
| <i>Use but distrust</i>                           | 0.41                                                       | 3,338  | (77.5%) | 436   | (10.1%) | 289   | (6.7%)  | 245   | (5.7%)  |
| <i>Use and trust</i>                              | 0.44                                                       | 10,329 | (76.4%) | 1,387 | (10.3%) | 858   | (6.3%)  | 943   | (7.0%)  |
| Information source for COVID-19: Newspapers       |                                                            |        |         |       |         |       |         |       |         |
| <i>Not use</i>                                    | 0.45                                                       | 12,925 | (76.0%) | 1,780 | (10.5%) | 1,057 | (6.2%)  | 1,234 | (7.3%)  |
| <i>Use but distrust</i>                           | 0.54                                                       | 542    | (70.2%) | 102   | (13.3%) | 69    | (9.0%)  | 58    | (7.5%)  |
| <i>Use and trust</i>                              | 0.46                                                       | 7,831  | (75.2%) | 1,092 | (10.5%) | 709   | (6.8%)  | 775   | (7.5%)  |
| Information source for COVID-19: Magazines        |                                                            |        |         |       |         |       |         |       |         |
| <i>Not use</i>                                    | 0.44                                                       | 19,390 | (76.5%) | 2,604 | (10.3%) | 1,588 | (6.3%)  | 1,756 | (6.9%)  |
| <i>Use but distrust</i>                           | 0.59                                                       | 346    | (67.7%) | 74    | (14.4%) | 46    | (9.0%)  | 46    | (8.9%)  |
| <i>Use and trust</i>                              | 0.64                                                       | 1,561  | (67.1%) | 296   | (12.7%) | 202   | (8.7%)  | 266   | (11.4%) |
| Information source for COVID-19: Books            |                                                            |        |         |       |         |       |         |       |         |
| <i>Not use</i>                                    | 0.43                                                       | 20,033 | (76.6%) | 2,658 | (10.2%) | 1,648 | (6.3%)  | 1,802 | (6.9%)  |
| <i>Use but distrust</i>                           | 0.82                                                       | 120    | (47.3%) | 80    | (31.5%) | 33    | (13.1%) | 21    | (8.1%)  |
| <i>Use and trust</i>                              | 0.72                                                       | 1,144  | (64.2%) | 237   | (13.3%) | 155   | (8.7%)  | 245   | (13.8%) |
| Information source for COVID-19: TV news          |                                                            |        |         |       |         |       |         |       |         |
| <i>Not use</i>                                    | 0.54                                                       | 4,516  | (72.1%) | 737   | (11.8%) | 401   | (6.4%)  | 607   | (9.7%)  |
| <i>Use but distrust</i>                           | 0.48                                                       | 2,055  | (74.0%) | 307   | (11.1%) | 223   | (8.0%)  | 193   | (7.0%)  |
| <i>Use and trust</i>                              | 0.43                                                       | 14,726 | (77.0%) | 1,930 | (10.1%) | 1,212 | (6.3%)  | 1,267 | (6.6%)  |
| Information source for COVID-19: Tabloid TV shows |                                                            |        |         |       |         |       |         |       |         |
| <i>Not use</i>                                    | 0.46                                                       | 8,720  | (75.3%) | 1,231 | (10.6%) | 741   | (6.4%)  | 881   | (7.6%)  |
| <i>Use but distrust</i>                           | 0.43                                                       | 2,686  | (76.4%) | 377   | (10.7%) | 231   | (6.6%)  | 224   | (6.4%)  |
| <i>Use and trust</i>                              | 0.46                                                       | 9,892  | (75.6%) | 1,367 | (10.4%) | 865   | (6.6%)  | 963   | (7.4%)  |



| Variable                                  | Mean | The number of conspiracy theory beliefs regarding COVID-19 |         |       |         |       |         |       |         |
|-------------------------------------------|------|------------------------------------------------------------|---------|-------|---------|-------|---------|-------|---------|
|                                           |      | None                                                       |         | One   |         | Two   |         | Three |         |
|                                           |      | n                                                          | (%)     | n     | (%)     | n     | (%)     | n     | (%)     |
| Trust in the government of Japan          |      |                                                            |         |       |         |       |         |       |         |
| <i>Distrust</i>                           | 0.40 | 13,760                                                     | (77.8%) | 1,840 | (10.4%) | 1,058 | (6.0%)  | 1,016 | (5.8%)  |
| <i>Trust</i>                              | 0.56 | 7,538                                                      | (71.8%) | 1,134 | (10.8%) | 778   | (7.4%)  | 1,051 | (10.0%) |
| Trust in the prefectural administration   |      |                                                            |         |       |         |       |         |       |         |
| <i>Distrust</i>                           | 0.42 | 10,491                                                     | (77.1%) | 1,423 | (10.5%) | 824   | (6.1%)  | 865   | (6.4%)  |
| <i>Trust</i>                              | 0.49 | 10,806                                                     | (74.2%) | 1,551 | (10.6%) | 1,011 | (6.9%)  | 1,203 | (8.2%)  |
| Trust in the municipal administration     |      |                                                            |         |       |         |       |         |       |         |
| <i>Distrust</i>                           | 0.42 | 10,257                                                     | (76.8%) | 1,452 | (10.9%) | 812   | (6.1%)  | 838   | (6.3%)  |
| <i>Trust</i>                              | 0.49 | 11,040                                                     | (74.5%) | 1,522 | (10.3%) | 1,024 | (6.9%)  | 1,230 | (8.3%)  |
| Fear of COVID-19                          |      |                                                            |         |       |         |       |         |       |         |
| <i>None</i>                               | 0.40 | 13,729                                                     | (77.9%) | 1,805 | (10.2%) | 1,111 | (6.3%)  | 982   | (5.6%)  |
| <i>Feeling</i>                            | 0.56 | 7,569                                                      | (71.8%) | 1,169 | (11.1%) | 725   | (6.9%)  | 1,085 | (10.3%) |
| Discriminated against related to COVID-19 |      |                                                            |         |       |         |       |         |       |         |
| <i>Never</i>                              | 0.44 | 20,306                                                     | (76.6%) | 2,631 | (9.9%)  | 1,644 | (6.2%)  | 1,936 | (7.3%)  |
| <i>Experienced</i>                        | 0.68 | 992                                                        | (59.8%) | 344   | (20.7%) | 192   | (11.6%) | 132   | (8.0%)  |
| Medical history of COVID-19               |      |                                                            |         |       |         |       |         |       |         |
| <i>None</i>                               | 0.45 | 21,001                                                     | (76.2%) | 2,800 | (10.2%) | 1,757 | (6.4%)  | 2,010 | (7.3%)  |
| <i>Diagnosed within the past year</i>     | 0.77 | 200                                                        | (57.5%) | 71    | (20.3%) | 33    | (9.5%)  | 44    | (12.7%) |
| <i>Diagnosed before the past year</i>     | 0.91 | 96                                                         | (37.2%) | 103   | (40.0%) | 45    | (17.6%) | 13    | (5.2%)  |
| Medical history of depression             |      |                                                            |         |       |         |       |         |       |         |
| <i>Never</i>                              | 0.45 | 18,729                                                     | (76.1%) | 2,510 | (10.2%) | 1,525 | (6.2%)  | 1,840 | (7.5%)  |
| <i>Former</i>                             | 0.47 | 1,554                                                      | (74.0%) | 244   | (11.6%) | 177   | (8.4%)  | 127   | (6.0%)  |
| <i>Current</i>                            | 0.54 | 1,015                                                      | (69.0%) | 221   | (15.0%) | 135   | (9.2%)  | 100   | (6.8%)  |
| Medical history of other mental disorders |      |                                                            |         |       |         |       |         |       |         |
| <i>Never</i>                              | 0.45 | 19,394                                                     | (76.0%) | 2,618 | (10.3%) | 1,596 | (6.2%)  | 1,918 | (7.5%)  |
| <i>Former</i>                             | 0.46 | 957                                                        | (72.7%) | 183   | (13.9%) | 109   | (8.3%)  | 68    | (5.2%)  |
| <i>Current</i>                            | 0.51 | 946                                                        | (71.0%) | 173   | (13.0%) | 131   | (9.8%)  | 81    | (6.1%)  |

**Table 3. Associations between independent variables and the number of COVID-19 conspiracy beliefs**

| Variable                                                           | Weighted crude model<br>(n=28,175) |                | Weighted multivariable adjusted model<br>(n=28,175) |                |
|--------------------------------------------------------------------|------------------------------------|----------------|-----------------------------------------------------|----------------|
|                                                                    | B                                  | 95% CI         | B                                                   | 95% CI         |
| The number of conspiracy theory beliefs regarding general vaccines |                                    |                |                                                     |                |
| 0 (reference)                                                      | —                                  | —              | —                                                   | —              |
| 1                                                                  | 0.071                              | 0.027, 0.115   | 0.059                                               | 0.017, 0.102   |
| 2                                                                  | 0.043                              | -0.008, 0.093  | 0.045                                               | -0.004, 0.094  |
| 3                                                                  | 0.043                              | -0.021, 0.107  | 0.040                                               | -0.022, 0.103  |
| 4                                                                  | 0.154                              | 0.073, 0.234   | 0.178                                               | 0.098, 0.258   |
| 5                                                                  | 0.088                              | 0.002, 0.174   | 0.128                                               | 0.042, 0.215   |
| 6                                                                  | 0.347                              | 0.243, 0.451   | 0.401                                               | 0.299, 0.503   |
| 7                                                                  | 0.710                              | 0.585, 0.835   | 0.718                                               | 0.593, 0.843   |
| Age (years old)                                                    |                                    |                |                                                     |                |
| 45–49 (reference)                                                  | —                                  | —              | —                                                   | —              |
| 16–19                                                              | 0.129                              | 0.012, 0.246   | 0.140                                               | 0.013, 0.266   |
| 20–24                                                              | 0.098                              | 0.029, 0.167   | 0.080                                               | -0.002, 0.163  |
| 25–29                                                              | 0.057                              | -0.011, 0.125  | 0.029                                               | -0.040, 0.098  |
| 30–34                                                              | 0.071                              | 0.002, 0.139   | 0.060                                               | -0.008, 0.128  |
| 35–39                                                              | 0.020                              | -0.045, 0.085  | 0.027                                               | -0.036, 0.090  |
| 40–44                                                              | 0.009                              | -0.054, 0.071  | 0.001                                               | -0.060, 0.061  |
| 50–54                                                              | -0.033                             | -0.095, 0.028  | -0.025                                              | -0.085, 0.034  |
| 55–59                                                              | -0.009                             | -0.072, 0.053  | -0.004                                              | -0.066, 0.058  |
| 60–64                                                              | 0.024                              | -0.040, 0.089  | 0.050                                               | -0.015, 0.116  |
| 65–69                                                              | 0.016                              | -0.047, 0.080  | 0.053                                               | -0.014, 0.121  |
| 70–74                                                              | 0.006                              | -0.054, 0.067  | 0.050                                               | -0.016, 0.116  |
| 75–81                                                              | 0.083                              | 0.013, 0.153   | 0.095                                               | 0.015, 0.174   |
| Sex                                                                |                                    |                |                                                     |                |
| Men (reference)                                                    | —                                  | —              | —                                                   | —              |
| Women                                                              | -0.133                             | -0.162, -0.105 | -0.095                                              | -0.130, -0.061 |
| Marital status                                                     |                                    |                |                                                     |                |
| Married (reference)                                                | —                                  | —              | —                                                   | —              |
| Unmarried                                                          | -0.009                             | -0.042, 0.024  | -0.054                                              | -0.095, -0.013 |
| Widowed                                                            | -0.026                             | -0.100, 0.049  | -0.012                                              | -0.089, 0.064  |
| Divorced                                                           | -0.047                             | -0.107, 0.014  | -0.032                                              | -0.096, 0.031  |
| Educational attainment                                             |                                    |                |                                                     |                |
| Upper Secondary School (reference)                                 | —                                  | —              | —                                                   | —              |
| Lower Secondary School                                             | -0.064                             | -0.150, 0.023  | -0.089                                              | -0.172, -0.006 |
| Specialised Training College (Post-Secondary Courses)              | 0.005                              | -0.039, 0.050  | 0.018                                               | -0.026, 0.061  |
| Junior College and College of Technology                           | -0.013                             | -0.056, 0.029  | 0.034                                               | -0.008, 0.077  |
| University                                                         | 0.040                              | 0.010, 0.070   | 0.009                                               | -0.024, 0.042  |
| Master's or doctor's degrees                                       | -0.035                             | -0.092, 0.022  | -0.066                                              | -0.126, -0.006 |
| Employment status                                                  |                                    |                |                                                     |                |
| Regular employee (reference)                                       | —                                  | —              | —                                                   | —              |
| Temporary employee                                                 | -0.093                             | -0.134, -0.052 | -0.051                                              | -0.095, -0.007 |

| Variable                                                                | Weighted crude model<br>(n=28,175) |                | Weighted multivariable adjusted model<br>(n=28,175) |                |
|-------------------------------------------------------------------------|------------------------------------|----------------|-----------------------------------------------------|----------------|
|                                                                         | B                                  | 95% CI         | B                                                   | 95% CI         |
| <i>Self-employed</i>                                                    | -0.071                             | -0.132, -0.010 | -0.102                                              | -0.162, -0.042 |
| <i>Employer</i>                                                         | 0.075                              | -0.011, 0.161  | 0.004                                               | -0.081, 0.089  |
| <i>Student</i>                                                          | 0.010                              | -0.071, 0.091  | -0.061                                              | -0.155, 0.034  |
| <i>Unemployed or retired</i>                                            | -0.052                             | -0.096, -0.008 | -0.078                                              | -0.131, -0.025 |
| <i>Housekeeper</i>                                                      | -0.129                             | -0.167, -0.091 | -0.086                                              | -0.135, -0.037 |
| <i>Others</i>                                                           | -0.126                             | -0.257, 0.004  | -0.118                                              | -0.248, 0.012  |
| Annual household income                                                 |                                    |                |                                                     |                |
| <i>4 to &lt;5 million yen (reference)</i>                               | —                                  | —              | —                                                   | —              |
| <i>0 to &lt;2 million yen</i>                                           | 0.023                              | -0.038, 0.085  | 0.038                                               | -0.024, 0.101  |
| <i>2 to &lt;4 million yen</i>                                           | 0.030                              | -0.014, 0.074  | 0.035                                               | -0.008, 0.078  |
| <i>5 to &lt;8 million yen</i>                                           | 0.022                              | -0.021, 0.065  | 0.016                                               | -0.026, 0.058  |
| <i>≥8 million yen</i>                                                   | 0.098                              | 0.050, 0.145   | 0.069                                               | 0.020, 0.117   |
| Household financial assets                                              |                                    |                |                                                     |                |
| <i>0 to &lt;1 million yen (reference)</i>                               | —                                  | —              | —                                                   | —              |
| <i>1 to &lt;4 million yen</i>                                           | 0.065                              | 0.019, 0.111   | 0.039                                               | -0.006, 0.084  |
| <i>4 to &lt;9 million yen</i>                                           | 0.051                              | 0.005, 0.096   | 0.020                                               | -0.026, 0.066  |
| <i>9 to &lt;20 million yen</i>                                          | 0.092                              | 0.044, 0.139   | 0.060                                               | 0.010, 0.109   |
| <i>≥20 million yen</i>                                                  | 0.005                              | -0.042, 0.051  | -0.016                                              | -0.068, 0.036  |
| Household indebtedness                                                  |                                    |                |                                                     |                |
| <i>None (reference)</i>                                                 | —                                  | —              | —                                                   | —              |
| <i>&gt;0 to &lt;2 million yen</i>                                       | 0.020                              | -0.036, 0.075  | -0.025                                              | -0.080, 0.030  |
| <i>≥2 million yen</i>                                                   | 0.035                              | 0.002, 0.069   | -0.016                                              | -0.052, 0.020  |
| Information source for COVID-19: Websites of government agencies        |                                    |                |                                                     |                |
| <i>Not used (reference)</i>                                             | —                                  | —              | —                                                   | —              |
| <i>Use but distrust</i>                                                 | 0.184                              | 0.088, 0.281   | 0.083                                               | -0.011, 0.178  |
| <i>Use and trust</i>                                                    | -0.066                             | -0.094, -0.038 | -0.109                                              | -0.139, -0.079 |
| Information source for COVID-19: Websites of research institutions      |                                    |                |                                                     |                |
| <i>Not used (reference)</i>                                             | —                                  | —              | —                                                   | —              |
| <i>Use but distrust</i>                                                 | 0.352                              | 0.192, 0.512   | 0.036                                               | -0.125, 0.198  |
| <i>Use and trust</i>                                                    | 0.138                              | 0.083, 0.193   | 0.039                                               | -0.016, 0.094  |
| Information source for COVID-19: Video sharing platforms (e.g. YouTube) |                                    |                |                                                     |                |
| <i>Not used (reference)</i>                                             | —                                  | —              | —                                                   | —              |
| <i>Use but distrust</i>                                                 | 0.070                              | -0.002, 0.143  | -0.002                                              | -0.073, 0.070  |
| <i>Use and trust</i>                                                    | 0.220                              | 0.170, 0.270   | 0.089                                               | 0.038, 0.139   |
| Information source for COVID-19: LINE                                   |                                    |                |                                                     |                |
| <i>Not used (reference)</i>                                             | —                                  | —              | —                                                   | —              |
| <i>Use but distrust</i>                                                 | 0.139                              | 0.050, 0.228   | 0.064                                               | -0.029, 0.157  |
| <i>Use and trust</i>                                                    | 0.131                              | 0.088, 0.173   | 0.053                                               | 0.009, 0.097   |
| Information source for COVID-19: Twitter                                |                                    |                |                                                     |                |
| <i>Not used (reference)</i>                                             | —                                  | —              | —                                                   | —              |
| <i>Use but distrust</i>                                                 | 0.043                              | -0.025, 0.112  | -0.002                                              | -0.069, 0.066  |
| <i>Use and trust</i>                                                    | 0.164                              | 0.111, 0.217   | 0.048                                               | -0.005, 0.102  |

| Variable                                          | Weighted crude model<br>(n=28,175) |                | Weighted multivariable adjusted model<br>(n=28,175) |                |
|---------------------------------------------------|------------------------------------|----------------|-----------------------------------------------------|----------------|
|                                                   | B                                  | 95% CI         | B                                                   | 95% CI         |
| Information source for COVID-19: Facebook         |                                    |                |                                                     |                |
| <i>Not used (reference)</i>                       | —                                  | —              | —                                                   | —              |
| <i>Use but distrust</i>                           | 0.222                              | 0.107, 0.337   | 0.042                                               | -0.079, 0.163  |
| <i>Use and trust</i>                              | 0.332                              | 0.246, 0.419   | 0.089                                               | 0.000, 0.178   |
| Information source for COVID-19: Instagram        |                                    |                |                                                     |                |
| <i>Not used (reference)</i>                       | —                                  | —              | —                                                   | —              |
| <i>Use but distrust</i>                           | 0.165                              | 0.066, 0.264   | -0.012                                              | -0.120, 0.095  |
| <i>Use and trust</i>                              | 0.306                              | 0.225, 0.387   | 0.093                                               | 0.008, 0.178   |
| Information source for COVID-19: Web news         |                                    |                |                                                     |                |
| <i>Not used (reference)</i>                       | —                                  | —              | —                                                   | —              |
| <i>Use but distrust</i>                           | -0.093                             | -0.135, -0.052 | -0.080                                              | -0.123, -0.037 |
| <i>Use and trust</i>                              | -0.060                             | -0.092, -0.029 | -0.068                                              | -0.102, -0.034 |
| Information source for COVID-19: Newspapers       |                                    |                |                                                     |                |
| <i>Not used (reference)</i>                       | —                                  | —              | —                                                   | —              |
| <i>Use but distrust</i>                           | 0.092                              | 0.001, 0.183   | -0.035                                              | -0.128, 0.057  |
| <i>Use and trust</i>                              | 0.018                              | -0.011, 0.047  | 0.011                                               | -0.023, 0.045  |
| Information source for COVID-19: Magazines        |                                    |                |                                                     |                |
| <i>Not used (reference)</i>                       | —                                  | —              | —                                                   | —              |
| <i>Use but distrust</i>                           | 0.156                              | 0.053, 0.259   | 0.004                                               | -0.103, 0.111  |
| <i>Use and trust</i>                              | 0.208                              | 0.151, 0.265   | 0.051                                               | -0.007, 0.109  |
| Information source for COVID-19: Books            |                                    |                |                                                     |                |
| <i>Not used (reference)</i>                       | —                                  | —              | —                                                   | —              |
| <i>Use but distrust</i>                           | 0.385                              | 0.239, 0.532   | 0.137                                               | -0.011, 0.286  |
| <i>Use and trust</i>                              | 0.286                              | 0.219, 0.352   | 0.136                                               | 0.068, 0.204   |
| Information source for COVID-19: TV news          |                                    |                |                                                     |                |
| <i>Not used (reference)</i>                       | —                                  | —              | —                                                   | —              |
| <i>Use but distrust</i>                           | -0.057                             | -0.112, -0.001 | -0.040                                              | -0.102, 0.022  |
| <i>Use and trust</i>                              | -0.110                             | -0.147, -0.073 | -0.081                                              | -0.128, -0.035 |
| Information source for COVID-19: Tabloid TV shows |                                    |                |                                                     |                |
| <i>Not used (reference)</i>                       | —                                  | —              | —                                                   | —              |
| <i>Use but distrust</i>                           | -0.033                             | -0.077, 0.011  | 0.005                                               | -0.043, 0.053  |
| <i>Use and trust</i>                              | -0.005                             | -0.036, 0.025  | 0.051                                               | 0.015, 0.087   |
| Trust in the government of Japan                  |                                    |                |                                                     |                |
| <i>Distrust (reference)</i>                       | —                                  | —              | —                                                   | —              |
| <i>Trust</i>                                      | 0.160                              | 0.130, 0.191   | 0.175                                               | 0.139, 0.211   |
| Trust in the prefectural administration           |                                    |                |                                                     |                |
| <i>Distrust (reference)</i>                       | —                                  | —              | —                                                   | —              |
| <i>Trust</i>                                      | 0.076                              | 0.048, 0.104   | 0.026                                               | -0.023, 0.074  |
| Trust in the municipal administration             |                                    |                |                                                     |                |
| <i>Distrust (reference)</i>                       | —                                  | —              | —                                                   | —              |
| <i>Trust</i>                                      | 0.072                              | 0.044, 0.100   | 0.025                                               | -0.023, 0.074  |
| Fear of COVID-19                                  |                                    |                |                                                     |                |
| <i>None (reference)</i>                           | —                                  | —              | —                                                   | —              |
| <i>Feeling</i>                                    | 0.161                              | 0.131, 0.192   | 0.145                                               | 0.115, 0.175   |
| Discriminated against related to COVID-19         |                                    |                |                                                     |                |

| Variable                                  | Weighted crude model<br>(n=28,175) |               | Weighted multivariable adjusted model<br>(n=28,175) |               |
|-------------------------------------------|------------------------------------|---------------|-----------------------------------------------------|---------------|
|                                           | B                                  | 95% CI        | B                                                   | 95% CI        |
| <i>Never (reference)</i>                  | —                                  | —             | —                                                   | —             |
| <i>Experienced</i>                        | 0.235                              | 0.172, 0.297  | 0.088                                               | 0.025, 0.151  |
| Medical history of COVID-19               |                                    |               |                                                     |               |
| <i>None (reference)</i>                   | —                                  | —             | —                                                   | —             |
| <i>Diagnosed within the past year</i>     | 0.325                              | 0.144, 0.505  | 0.187                                               | 0.011, 0.363  |
| <i>Diagnosed before the past year</i>     | 0.459                              | 0.327, 0.590  | 0.169                                               | 0.024, 0.314  |
| Medical history of depression             |                                    |               |                                                     |               |
| <i>Never (reference)</i>                  | —                                  | —             | —                                                   | —             |
| <i>Former</i>                             | 0.015                              | -0.037, 0.067 | 0.010                                               | -0.042, 0.062 |
| <i>Current</i>                            | 0.087                              | 0.016, 0.159  | 0.050                                               | -0.026, 0.127 |
| Medical history of other mental disorders |                                    |               |                                                     |               |
| <i>Never (reference)</i>                  | —                                  | —             | —                                                   | —             |
| <i>Former</i>                             | 0.006                              | -0.057, 0.070 | -0.041                                              | -0.105, 0.024 |
| <i>Current</i>                            | 0.057                              | -0.016, 0.129 | 0.007                                               | -0.071, 0.085 |

CI, confidence interval

Linear regression analysis with a robust error variance was used, applying sampling weights and imputation. A positive coefficient means holding more conspiracy theories while a negative coefficient means holding fewer conspiracy theories.

The fully adjusted model included all independent variables simultaneously.
